# Supplementary material for: Theoretical Kinetic and Mechanistic Studies on the Reactions of CF3CBrCH2 (2-BTP) with OH and H Radicals
Source: MDPI journal article supplement (doi:10.3390/molecules22122140), 2017-12-06
Supplement: s1 [file s1]

## *Supplemental Material-II*

### **Theoretical Kinetic and Mechanism Studies on the Reactions of CF<sub>3</sub>CB<sub>2</sub>H<sub>2</sub> (2-BTP) with OH and H Radicals**

Huiting Bian<sup>1</sup>, Lili Ye<sup>2</sup>, Jinhua Sun<sup>1,\*</sup>

<sup>1</sup> *State Key Laboratory of Fire Science, University of Science and Technology of China, Hefei, Anhui 230026, P. R. China*

<sup>2</sup> *Key Laboratory for Power Machinery and Engineering of MOE, Shanghai Jiao Tong University, Shanghai 200240, P. R. China*

#### **Index of supplemental material-II**

Geometries and frequencies of all the species involved in the present work

- Geometries and frequencies of transition states, reactants, intermediates and products involved in the reactions of 2-BTP + OH calculated at B3LYP/aug-cc-pVTZ. 2
- Geometries and frequencies of transition states, reactants, intermediates and products involved in the reactions of 2-BTP + H calculated at B3LYP/aug-cc-pVTZ. 19

- **Geometries and frequencies of major species involved in the present work**
- Geometries and frequencies of transition states, reactants, intermediates and products involved in the reactions of 2-BTP + OH calculated at B3LYP/aug-cc-pVTZ.

### TSa1

| Cartessian coordinates: |          |          |          | Frequencies (cm-1): |          |          |
|-------------------------|----------|----------|----------|---------------------|----------|----------|
| C                       | 0.833621 | -0.90039 | -0.0097  | -20.0752            | 20.3922  | 53.7807  |
| C                       | -0.08845 | 0.072386 | 0.682234 | 73.4781             | 165.8377 | 185.2429 |
| C                       | 0.23856  | 0.710159 | 1.791895 | 225.2122            | 251.9462 | 326.6902 |
| H                       | 1.200707 | 0.540602 | 2.252882 | 336.4443            | 480.5961 | 482.4582 |
| H                       | -0.43475 | 1.413365 | 2.257379 | 577.9922            | 616.717  | 690.9262 |
| F                       | 0.253545 | -2.08986 | -0.22484 | 730.3832            | 825.8335 | 978.9331 |
| F                       | 1.950856 | -1.11559 | 0.703837 | 1092.542            | 1113.654 | 1172.012 |
| F                       | 1.225095 | -0.42687 | -1.22161 | 1270.072            | 1433.732 | 1689.027 |
| Br                      | -1.7515  | 0.32919  | -0.20149 | 3165.938            | 3256.234 | 3685.689 |
| O                       | 2.659834 | 2.301418 | -0.55718 |                     |          |          |
| H                       | 2.490152 | 1.510926 | -1.10387 |                     |          |          |

### TSa2

| Cartessian coordinates: |          |          |          | Frequencies (cm-1): |          |          |
|-------------------------|----------|----------|----------|---------------------|----------|----------|
| C                       | 1.250571 | -0.43354 | -0.0157  | -277.069            | 66.7584  | 137.1088 |
| C                       | 0.070942 | 0.425026 | 0.411068 | 149.0496            | 190.118  | 243.4862 |
| C                       | 0.196386 | 1.382845 | 1.353868 | 299.834             | 324.6533 | 337.7329 |
| H                       | 1.176548 | 1.688304 | 1.68996  | 434.8619            | 479.665  | 570.284  |
| H                       | -0.66924 | 1.885567 | 1.75317  | 578.9215            | 652.6766 | 690.4043 |
| F                       | 1.339248 | -1.52186 | 0.775872 | 733.9596            | 832.0904 | 913.6741 |
| F                       | 2.408372 | 0.249332 | 0.119411 | 1089.367            | 1129.787 | 1192.055 |
| F                       | 1.169698 | -0.85803 | -1.27532 | 1253.612            | 1418.755 | 1574.768 |
| Br                      | -1.62139 | -0.29607 | -0.03434 | 3167.91             | 3269.919 | 3723.716 |
| O                       | 0.21622  | 1.938862 | -1.0417  |                     |          |          |
| H                       | 1.148388 | 2.20686  | -0.98273 |                     |          |          |

### TSa3

| Cartessian coordinates: |          |          |          | Frequencies (cm-1): |          |          |
|-------------------------|----------|----------|----------|---------------------|----------|----------|
| C                       | -1.59573 | -0.2041  | 0.091669 | -320.004            | 34.4739  | 50.7604  |
| C                       | -0.53486 | 0.793953 | -0.21954 | 104.9979            | 115.9783 | 156.0603 |
| C                       | -0.65177 | 2.048761 | -0.56918 | 220.9991            | 255.2096 | 375.0053 |
| H                       | -1.62849 | 2.509622 | -0.68639 | 441.6907            | 458.7604 | 544.8195 |
| H                       | 0.214243 | 2.671875 | -0.75505 | 563.0267            | 591.1172 | 678.8675 |

|    |          |          |          |          |          |          |
|----|----------|----------|----------|----------|----------|----------|
| F  | -1.8104  | -1.06221 | -0.91977 | 797.5079 | 961.3706 | 1025.957 |
| F  | -2.78332 | 0.404812 | 0.344534 | 1106.227 | 1125.803 | 1136.416 |
| F  | -1.29295 | -0.93334 | 1.184283 | 1200.132 | 1420.815 | 1721.716 |
| Br | 1.716887 | 0.149873 | 0.236501 | 3104.576 | 3186.888 | 3745.634 |
| O  | 1.169999 | -1.24097 | -0.94279 |          |          |          |
| H  | 1.63731  | -2.01432 | -0.59287 |          |          |          |

#### TSa4

| Cartessian coordinates: |          |          |          | Frequencies (cm-1): |          |          |
|-------------------------|----------|----------|----------|---------------------|----------|----------|
| C                       | 1.557324 | 0.270994 | 0.000001 | -1488.75            | 42.766   | 79.3938  |
| C                       | 0.055081 | 0.474778 | -1.5E-05 | 87.1898             | 152.5268 | 160.3614 |
| C                       | -0.50238 | 1.660596 | -5.5E-05 | 245.0627            | 259.1051 | 323.0485 |
| H                       | 0.00467  | 2.615571 | -8.3E-05 | 472.9277            | 480.788  | 564.1789 |
| H                       | -1.75595 | 1.811841 | -6.5E-05 | 568.747             | 633.5091 | 635.2012 |
| F                       | 1.960908 | -0.41257 | 1.08377  | 700.3918            | 752.6917 | 879.2827 |
| F                       | 2.202958 | 1.450051 | -3.5E-05 | 889.3118            | 1100.939 | 1145.156 |
| F                       | 1.960924 | -0.41264 | -1.08371 | 1165.706            | 1236.911 | 1439.097 |
| Br                      | -0.94508 | -1.14596 | 0.000028 | 1685.109            | 3200.82  | 3731.065 |
| O                       | -2.97217 | 1.84098  | -0.00007 |                     |          |          |
| H                       | -3.17695 | 0.891527 | -3.8E-05 |                     |          |          |

#### TSa5

| Cartessian coordinates: |          |          |          | Frequencies (cm-1): |          |          |
|-------------------------|----------|----------|----------|---------------------|----------|----------|
| C                       | -0.65969 | 1.000279 | -1.5E-05 | -1470.88            | 34.9827  | 64.3259  |
| C                       | -0.08686 | -0.39736 | -3.1E-05 | 120.9887            | 147.4138 | 164.4461 |
| C                       | -0.77018 | -1.51522 | -9.2E-05 | 227.9802            | 262.9523 | 316.3203 |
| H                       | -2.02177 | -1.57191 | -0.0002  | 455.5382            | 479.297  | 560.6133 |
| H                       | -0.36842 | -2.51844 | -7.1E-05 | 575.0765            | 623.2139 | 650.8562 |
| F                       | -0.27099 | 1.691226 | 1.083353 | 686.3676            | 771.4101 | 872.7665 |
| F                       | -2.00828 | 0.982593 | 0.000005 | 896.7934            | 1088.037 | 1150.414 |
| F                       | -0.27101 | 1.691244 | -1.08338 | 1154.362            | 1257.991 | 1445.622 |
| Br                      | 1.827916 | -0.43983 | 0.000018 | 1689.797            | 3207.211 | 3748.906 |
| O                       | -3.25173 | -1.69554 | 0        |                     |          |          |
| H                       | -3.52012 | -0.76292 | 0.000665 |                     |          |          |

#### TSa6

| Cartessian coordinates: |          |          |          | Frequencies (cm-1): |          |          |
|-------------------------|----------|----------|----------|---------------------|----------|----------|
| C                       | -1.04081 | -0.13546 | -0.50495 | -441.989            | 52.1951  | 81.7137  |
| C                       | 0.07722  | 0.719314 | -0.06507 | 162.5493            | 188.7056 | 234.5716 |
| C                       | -0.10774 | 2.00493  | 0.205809 | 294.0852            | 334.7305 | 371.9124 |

|    |          |          |          |          |          |          |
|----|----------|----------|----------|----------|----------|----------|
| H  | -1.10174 | 2.425912 | 0.163732 | 403.6496 | 452.1123 | 517.937  |
| H  | 0.71523  | 2.641839 | 0.491159 | 544.5442 | 623.1918 | 667.2312 |
| F  | -0.77765 | -1.24541 | -1.12776 | 709.8703 | 753.4077 | 859.7015 |
| F  | -1.99553 | 0.45246  | -1.17155 | 986.5465 | 1119.262 | 1247.581 |
| F  | -2.3217  | 0.248062 | 1.070601 | 1336.9   | 1429.069 | 1652.576 |
| Br | 1.778171 | -0.11326 | 0.035663 | 3166.851 | 3262.282 | 3758.679 |
| O  | -1.08029 | -1.35965 | 1.169699 |          |          |          |
| H  | -0.92534 | -0.85522 | 1.982956 |          |          |          |

### TSa7

| Cartessian coordinates: |          |          |          | Frequencies (cm-1): |          |          |
|-------------------------|----------|----------|----------|---------------------|----------|----------|
| C                       | 1.050923 | 0.161178 | 0.380886 | -459.759            | 50.505   | 73.72    |
| C                       | -0.20178 | 0.767543 | -0.13336 | 170.9345            | 195.8694 | 250.288  |
| C                       | -0.20066 | 1.964443 | -0.70468 | 325.4278            | 351.6112 | 372.0157 |
| H                       | 0.719311 | 2.521287 | -0.80824 | 394.8509            | 458.028  | 524.6907 |
| H                       | -1.10881 | 2.400554 | -1.09052 | 546.4883            | 619.7329 | 650.2797 |
| F                       | 0.981967 | -0.76561 | 1.281987 | 726.884             | 758.8316 | 845.7446 |
| F                       | 1.911841 | 1.081877 | 0.725437 | 977.1258            | 1112.532 | 1249.863 |
| F                       | 2.714752 | -0.60194 | -0.55903 | 1342.765            | 1428.557 | 1655.156 |
| Br                      | -1.78023 | -0.25885 | 0.068849 | 3167.246            | 3260.023 | 3741.324 |
| O                       | 0.883052 | -1.0893  | -1.23171 |                     |          |          |
| H                       | 1.265042 | -1.93581 | -0.94996 |                     |          |          |

### TSa8

| Cartessian coordinates: |          |          |          | Frequencies (cm-1): |          |          |
|-------------------------|----------|----------|----------|---------------------|----------|----------|
| C                       | -0.61754 | 0.921634 | -0.43845 | -526.967            | 38.9003  | 60.7364  |
| C                       | 0.449791 | 0.698984 | 0.451189 | 78.9952             | 110.0266 | 126.0035 |
| C                       | 0.554868 | 1.313866 | 1.652574 | 180.8771            | 189.049  | 216.6746 |
| H                       | -0.18437 | 2.041497 | 1.953957 | 321.3569            | 364.9165 | 410.6534 |
| H                       | 1.361001 | 1.08388  | 2.329597 | 523.4045            | 533.7231 | 602.2729 |
| F                       | -0.59464 | 0.556463 | -1.69519 | 647.4553            | 847.3294 | 853.5597 |
| F                       | -1.45314 | 1.915372 | -0.23552 | 1117.25             | 1206.863 | 1313.361 |
| F                       | -1.96592 | -0.67983 | 0.248788 | 1349.407            | 1438.834 | 1522.912 |
| Br                      | 1.728372 | -0.60355 | -0.09519 | 3167.859            | 3268.221 | 3743.85  |
| O                       | -3.12735 | -1.67485 | 0.538425 |                     |          |          |
| H                       | -2.8503  | -2.33749 | -0.11382 |                     |          |          |

### M1-TSa1

| Cartessian coordinates: |          |          |          | Frequencies (cm-1): |         |          |
|-------------------------|----------|----------|----------|---------------------|---------|----------|
| C                       | 1.439914 | -0.11938 | -0.02159 | -647.804            | 44.7981 | 737.4005 |

|    |          |          |          |          |          |          |
|----|----------|----------|----------|----------|----------|----------|
| C  | 0.043434 | 0.420355 | -0.03987 | 158.4876 | 179.0608 | 199.634  |
| C  | -0.20172 | 1.745984 | -0.03902 | 326.4054 | 351.3925 | 376.3796 |
| H  | 0.621366 | 2.436047 | -0.16078 | 401.4213 | 442.6223 | 483.8233 |
| H  | 0.156046 | 2.084615 | 1.893863 | 534.1515 | 610.1244 | 686.0973 |
| F  | 1.699134 | -0.83077 | 1.092857 | 715.9782 | 934.4841 | 1152.99  |
| F  | 2.350937 | 0.877691 | -0.0774  | 1119.741 | 1123.608 | 1127.474 |
| F  | 1.680482 | -0.93511 | -1.0675  | 1253.409 | 1303.236 | 1353.064 |
| Br | -1.3417  | -0.85299 | 0.015832 | 1651.93  | 3188.325 | 3824.618 |
| O  | -1.45484 | 2.231767 | -0.14191 |          |          |          |
| H  | -1.44384 | 3.191875 | -0.08074 |          |          |          |

### M1-TSa2

| Cartessian coordinates: |          |          |          | Frequencies (cm-1): |          |          |
|-------------------------|----------|----------|----------|---------------------|----------|----------|
| C                       | 1.434094 | -0.17436 | 0.018622 | -1895.78            | 50.9864  | 118.6402 |
| C                       | 0.079319 | 0.414396 | 0.305771 | 151.348             | 156.7786 | 216.3849 |
| C                       | -0.06264 | 1.834478 | -0.02227 | 295.2799            | 366.9096 | 374.4352 |
| H                       | 0.689739 | 2.343702 | -0.61927 | 470.4358            | 486.0489 | 575.128  |
| H                       | 0.255005 | 1.366912 | 1.187634 | 613.4435            | 697.6425 | 824.8385 |
| F                       | 2.413315 | 0.683104 | 0.404006 | 906.5889            | 1074.457 | 1086.491 |
| F                       | 1.629204 | -0.41001 | -1.30005 | 1153.961            | 1218.295 | 1242.022 |
| F                       | 1.639255 | -1.33103 | 0.660272 | 1247.243            | 1302.629 | 1427.989 |
| Br                      | -1.39587 | -0.81845 | -0.00516 | 2101.377            | 3090.662 | 3807.413 |
| O                       | -1.3292  | 2.338583 | -0.0094  |                     |          |          |
| H                       | -1.29632 | 3.300783 | -0.00335 |                     |          |          |

### M1-TSa3

| Cartessian coordinates: |           |           |           | Frequencies (cm-1): |           |           |
|-------------------------|-----------|-----------|-----------|---------------------|-----------|-----------|
| C                       | 1.288806  | -0.440376 | -0.379141 | -209.0883           | 70.1039   | 117.3477  |
| C                       | 0.214317  | 0.275103  | 0.069445  | 142.9361            | 160.6693  | 193.2738  |
| C                       | 0.292378  | 1.734429  | 0.421077  | 255.4849            | 313.3167  | 327.5318  |
| H                       | 1.333983  | 2.005229  | 0.571267  | 371.9347            | 456.6298  | 515.0172  |
| H                       | -0.236718 | 1.884159  | 1.362915  | 591.4087            | 658.4083  | 895.1229  |
| F                       | 1.062999  | -0.449901 | 1.780392  | 1029.5607           | 1057.3564 | 1140.2765 |
| F                       | 2.480899  | 0.064739  | -0.487613 | 1224.9201           | 1357.6917 | 1363.904  |
| F                       | 1.244093  | -1.67221  | -0.777948 | 1396.3118           | 1488.5685 | 1646.3261 |
| Br                      | -1.490017 | -0.50785  | -0.047147 | 3059.3642           | 3131.981  | 3801.0232 |
| O                       | -0.205719 | 2.561707  | -0.617296 |                     |           |           |
| H                       | -1.165841 | 2.493123  | -0.647436 |                     |           |           |

### M1-TSa4

| Cartessian coordinates: |          |          |          | Frequencies (cm-1): |          |          |
|-------------------------|----------|----------|----------|---------------------|----------|----------|
| C                       | 1.539897 | -0.1639  | -0.00034 | -1036.79            | 54.8333  | 113.3527 |
| C                       | 0.290431 | 0.395245 | -0.00012 | 165.8204            | 171.4605 | 198.3956 |
| C                       | 0.070904 | 1.763729 | -0.00019 | 219.6859            | 250.9124 | 348.6525 |
| H                       | 2.645781 | 0.574462 | 0.000259 | 375.1757            | 446.604  | 536.8474 |
| F                       | 1.816049 | -1.45234 | 0.000011 | 578.5611            | 611.1245 | 660.3914 |
| F                       | -1.19341 | -0.79604 | 0.000023 | 952.1716            | 1027.893 | 1106.533 |
| F                       | 0.900632 | 2.454996 | -0.00062 | 1197.855            | 1247.004 | 1351.264 |
| Br                      | -1.19196 | 2.264005 | 0.000142 | 1363.076            | 1451.547 | 1567.236 |
| H                       | -1.15929 | 3.224717 | 0.000106 | 1897.69             | 3004.341 | 3825.091 |
| O                       | 1.539897 | -0.1639  | -0.00034 |                     |          |          |
| H                       | 0.290431 | 0.395245 | -0.00012 |                     |          |          |

### M1-TSa5

| Cartessian coordinates: |          |          |          | Frequencies (cm-1): |          |          |
|-------------------------|----------|----------|----------|---------------------|----------|----------|
| C                       | 1.219798 | -0.57037 | -0.01733 | -2003.6             | 54.4169  | 121.0425 |
| C                       | 0.104006 | 0.457634 | -0.03152 | 151.8084            | 206.248  | 289.9963 |
| C                       | 0.336839 | 1.755926 | 0.689627 | 314.3429            | 379.6929 | 448.387  |
| H                       | 1.241091 | 1.791457 | 1.29616  | 545.5947            | 581.7314 | 673.0145 |
| H                       | -0.52327 | 2.129565 | 1.240914 | 805.1037            | 838.3107 | 944.8863 |
| F                       | 1.258713 | -1.23336 | 1.157474 | 969.563             | 1091.851 | 1122.839 |
| F                       | 2.411719 | 0.030286 | -0.17635 | 1144.989            | 1157.238 | 1185.503 |
| F                       | 1.083688 | -1.47921 | -0.99172 | 1290.792            | 1317.173 | 1515.565 |
| Br                      | -1.65166 | -0.29086 | -0.01476 | 1968.609            | 3060.909 | 3117.157 |
| O                       | 0.509813 | 2.410364 | -0.5859  |                     |          |          |
| H                       | 0.260697 | 1.257594 | -1.0827  |                     |          |          |

### M1-TSa6

| Cartessian coordinates: |          |          |          | Frequencies (cm-1): |          |          |
|-------------------------|----------|----------|----------|---------------------|----------|----------|
| C                       | 0.790241 | -0.88318 | -0.35169 | -1572.84            | 75.9679  | 96.0759  |
| C                       | 0.00378  | 0.242956 | -0.39256 | 149.4011            | 176.2983 | 207.7018 |
| C                       | 0.622981 | 1.58956  | -0.59894 | 246.095             | 318.7898 | 363.6553 |
| H                       | -0.11438 | 2.368901 | -0.35233 | 459.8469            | 534.5496 | 611.2849 |
| H                       | 0.78364  | 1.711766 | -1.69159 | 628.656             | 720.1693 | 830.3512 |
| F                       | 1.816896 | -0.08267 | 1.498463 | 1008.919            | 1104.427 | 1146.949 |
| F                       | 1.948849 | -0.94991 | -0.92323 | 1176.933            | 1211.32  | 1289.991 |
| F                       | 0.370654 | -2.04243 | 0.032325 | 1374.945            | 1381.047 | 1571.889 |
| Br                      | -1.79183 | 0.082201 | 0.092681 | 1607.966            | 2834.535 | 2945.409 |
| O                       | 1.801397 | 1.765899 | 0.06548  |                     |          |          |

|   |          |          |          |
|---|----------|----------|----------|
| H | 1.904148 | 0.894203 | 0.867387 |
|---|----------|----------|----------|

### M2-TSa1

Cartessian coordinates:

Frequencies (cm-1):

|    |          |          |          |          |          |          |
|----|----------|----------|----------|----------|----------|----------|
| C  | 1.136083 | -0.76035 | 0.098168 | -912.536 | 53.0559  | 75.8137  |
| C  | 0.387223 | 0.205463 | 0.80812  | 113.9411 | 156.9778 | 242.2872 |
| C  | 0.49315  | 1.574208 | 0.454692 | 306.7494 | 334.168  | 424.7715 |
| H  | -0.2138  | 2.283754 | 0.879063 | 493.677  | 553.4748 | 623.0001 |
| H  | 0.053426 | -0.06607 | 1.796698 | 745.4965 | 796.5184 | 827.0615 |
| F  | 2.82023  | 0.167991 | -0.14295 | 936.7184 | 1022.376 | 1106.797 |
| F  | 1.01625  | -0.92765 | -1.17781 | 1266.668 | 1313.857 | 1379.095 |
| F  | 1.512279 | -1.8444  | 0.68897  | 1399.052 | 1510.7   | 1634.687 |
| Br | -2.10179 | -0.06246 | -0.07132 | 1679.03  | 3133.689 | 3225.57  |
| O  | 1.405722 | 2.016523 | -0.28966 |          |          |          |
| H  | 2.239541 | 1.156899 | -0.34196 |          |          |          |

### M2-TSa2

Cartessian coordinates:

Frequencies (cm-1):

|    |          |          |          |          |          |          |
|----|----------|----------|----------|----------|----------|----------|
| C  | 1.5004   | -0.67173 | 0.00118  | -303.955 | 13.3319  | 64.5665  |
| C  | -0.34579 | 0.725182 | 0.472989 | 92.5662  | 127.6765 | 145.4781 |
| C  | -0.12249 | 1.83865  | -0.2597  | 216.1857 | 275.89   | 355.967  |
| H  | -0.5692  | 1.988332 | -1.23352 | 377.1557 | 501.0847 | 506.6442 |
| H  | -0.04222 | 0.651227 | 1.504835 | 628.9543 | 750.6994 | 790.2182 |
| F  | 1.486645 | -1.75947 | 0.771534 | 903.9628 | 984.1415 | 1142.882 |
| F  | 2.603134 | 0.036869 | 0.247509 | 1160.491 | 1176.615 | 1184.188 |
| F  | 1.475584 | -1.02612 | -1.28184 | 1290.162 | 1320.186 | 1604.279 |
| Br | -1.78696 | -0.42634 | -0.00591 | 3180.911 | 3213.635 | 3828.315 |
| O  | 0.74523  | 2.779252 | 0.188698 |          |          |          |
| H  | 0.912353 | 3.434085 | -0.4956  |          |          |          |

### M2-TSa3

Cartessian coordinates:

Frequencies (cm-1):

|   |          |          |          |          |          |          |
|---|----------|----------|----------|----------|----------|----------|
| C | -1.44317 | -0.12326 | 0.008971 | -722.872 | 54.1537  | 155.0362 |
| C | -0.05398 | 0.434896 | -0.16735 | 174.1938 | 175.8543 | 320.2491 |
| C | 0.162281 | 1.755179 | -0.00798 | 325.4211 | 378.9705 | 397.668  |
| H | -0.67619 | 2.438928 | 0.003238 | 402.0191 | 454.2564 | 503.1832 |
| H | -0.14536 | 0.350397 | -2.14347 | 530.1266 | 598.245  | 614.2131 |
| F | -1.68163 | -1.19    | -0.76399 | 718.3332 | 874.9197 | 942.1077 |
| F | -2.37698 | 0.81012  | -0.28211 | 1114.251 | 1146.324 | 1185.743 |

|    |          |          |          |          |          |          |
|----|----------|----------|----------|----------|----------|----------|
| F  | -1.66231 | -0.51016 | 1.285546 | 1264.02  | 1299.643 | 1344.767 |
| Br | 1.365242 | -0.81789 | 0.011844 | 1669.821 | 3182.376 | 3823.932 |
| O  | 1.397591 | 2.276195 | 0.059149 |          |          |          |
| H  | 1.354781 | 3.236795 | 0.095602 |          |          |          |

#### M2-TSa4

| Cartessian coordinates: |          |          |          | Frequencies (cm-1): |          |          |
|-------------------------|----------|----------|----------|---------------------|----------|----------|
| C                       | -0.40248 | -0.97653 | 0.053685 | -671.778            | 91.6788  | 110.5523 |
| C                       | -0.97171 | 0.226085 | -0.46484 | 145.9082            | 179.4334 | 202.4095 |
| C                       | -1.32302 | 1.282173 | 0.352788 | 216.3871            | 262.8994 | 343.0825 |
| H                       | -1.23453 | 1.231353 | 1.428395 | 399.4824            | 422.8379 | 474.3003 |
| H                       | -1.00194 | 0.31777  | -1.5376  | 490.8394            | 634.484  | 812.4055 |
| F                       | -0.06146 | -1.9552  | -0.70384 | 909.7139            | 924.8786 | 1154.234 |
| F                       | -2.37452 | -1.14426 | -0.25221 | 1225.935            | 1318.854 | 1324.167 |
| F                       | -0.40675 | -1.26455 | 1.310125 | 1420.801            | 1501.824 | 1653.587 |
| Br                      | 1.728923 | 0.355115 | -0.04344 | 3205.233            | 3251.748 | 3799.509 |
| O                       | -1.8106  | 2.382277 | -0.20778 |                     |          |          |
| H                       | -2.02334 | 3.04939  | 0.455321 |                     |          |          |

#### M3-TSa1

| Cartessian coordinates: |          |          |          | Frequencies (cm-1): |          |          |
|-------------------------|----------|----------|----------|---------------------|----------|----------|
| C                       | 1.543728 | -0.23647 | -0.12007 | -177.887            | 85.4295  | 99.2201  |
| C                       | 0.557247 | 0.651944 | 0.249049 | 110.3734            | 146.4693 | 195.7303 |
| C                       | 0.157194 | 1.82503  | -0.6163  | 258.3442            | 297.341  | 341.1579 |
| H                       | 0.112651 | 1.504423 | -1.65407 | 389.016             | 449.8149 | 508.448  |
| H                       | 0.957617 | 2.572154 | -0.51943 | 621.6773            | 774.8387 | 956.4545 |
| F                       | 0.479402 | 0.897556 | 1.565966 | 1070.476            | 1110.151 | 1226.758 |
| F                       | 1.836692 | -0.47773 | -1.37014 | 1258.856            | 1361.634 | 1366.885 |
| F                       | 2.149898 | -1.03169 | 0.713676 | 1422.686            | 1479.235 | 1609.15  |
| Br                      | -1.28551 | -0.96134 | -0.04023 | 2965.358            | 3122.144 | 3804.434 |
| O                       | -1.08905 | 2.377143 | -0.29028 |                     |          |          |
| H                       | -1.10797 | 2.616847 | 0.642282 |                     |          |          |

#### M3-TSa2

| Cartessian coordinates: |          |          |          | Frequencies (cm-1): |          |          |
|-------------------------|----------|----------|----------|---------------------|----------|----------|
| C                       | 1.378743 | -0.63485 | -0.24524 | -498.104            | 41.5819  | 80.0239  |
| C                       | 0.331397 | -0.21938 | 0.506004 | -498.104            | 41.5819  | 80.0239  |
| C                       | 0.228389 | 2.134308 | 0.440566 | 221.2699            | 290.2714 | 300.6903 |
| H                       | 1.249084 | 2.358796 | 0.714162 | 334.8278            | 350.0687 | 440.8061 |



|    |          |          |          |          |          |          |
|----|----------|----------|----------|----------|----------|----------|
| H  | -0.54023 | 2.194028 | 1.201984 | 334.8278 | 350.0687 | 440.8061 |
| F  | 0.488508 | -0.21395 | 1.842873 | 874.3377 | 976.7971 | 1076.402 |
| F  | 2.624932 | -0.57657 | 0.193508 | 1142.379 | 1193.091 | 1301.697 |
| F  | 1.319057 | -0.83052 | -1.54716 | 1368.331 | 1488.847 | 1637.897 |
| Br | -1.44517 | -0.5824  | -0.08572 | 3103.71  | 3234.735 | 3790.95  |
| O  | -0.08006 | 2.545273 | -0.81588 |          |          |          |
| H  | -1.01122 | 2.377809 | -0.99995 |          |          |          |

#### M4-TSa1

| Cartessian coordinates: |          |          |          | Frequencies (cm-1): |          |          |
|-------------------------|----------|----------|----------|---------------------|----------|----------|
| C                       | -0.24259 | 0.791732 | 0.117439 | -233.382            | 28.792   | 106.5698 |
| C                       | 1.086248 | 0.199609 | 0.47397  | 178.9955            | 244.5897 | 278.2408 |
| C                       | 2.225045 | 0.531888 | -0.25992 | 318.6596            | 332.4156 | 373.1168 |
| H                       | 2.268603 | 1.361108 | -0.95402 | 408.2299            | 542.0942 | 587.2763 |
| H                       | 1.16261  | -0.14962 | 1.490643 | 787.1067            | 860.4136 | 881.2443 |
| F                       | -0.17196 | 1.529051 | -1.01412 | 958.5714            | 965.5952 | 1073.561 |
| F                       | 1.439876 | -1.74401 | 0.227835 | 1165.759            | 1211.721 | 1290.518 |
| F                       | -0.6472  | 1.624696 | 1.10767  | 1350.553            | 1389.165 | 1598.387 |
| Br                      | -1.61918 | -0.58001 | -0.12105 | 2995.413            | 3195.329 | 3218.988 |
| O                       | 3.290921 | -0.20661 | -0.16765 |                     |          |          |
| H                       | 2.914159 | -1.08544 | 0.160117 |                     |          |          |

#### M4-TSa2

| Cartessian coordinates: |          |          |          | Frequencies (cm-1): |          |          |
|-------------------------|----------|----------|----------|---------------------|----------|----------|
| C                       | -0.20929 | -0.44548 | 0.391056 | -285.415            | 18.4767  | 61.1452  |
| C                       | 1.586993 | 0.863364 | -0.39207 | 89.3371             | 132.7289 | 195.1059 |
| C                       | 2.665741 | 0.150157 | -0.00845 | 235.1665            | 296.9907 | 306.5002 |
| H                       | 3.15077  | 0.334277 | 0.94108  | 329.6729            | 333.2941 | 519.3708 |
| H                       | 1.152718 | 0.823901 | -1.37931 | 559.9747            | 622.8543 | 778.4663 |
| F                       | -0.16899 | -0.31976 | 1.714278 | 898.3968            | 1085.151 | 1098.45  |
| F                       | 1.262363 | 1.966894 | 0.31566  | 1140.454            | 1181.796 | 1223.994 |
| F                       | 0.061728 | -1.71011 | 0.076261 | 1301.183            | 1348.977 | 1651.143 |
| Br                      | -1.9332  | 0.122772 | -0.33784 | 3182.343            | 3211.854 | 3836.654 |
| O                       | 3.120813 | -0.86046 | -0.79191 |                     |          |          |
| H                       | 3.735549 | -1.41288 | -0.30116 |                     |          |          |

#### M4-TSa3

| Cartessian coordinates: |          |          |          | Frequencies (cm-1): |         |          |
|-------------------------|----------|----------|----------|---------------------|---------|----------|
| C                       | -0.20482 | 0.735589 | 0.091874 | -599.049            | 62.2054 | 141.9055 |

|    |          |          |          |          |          |          |
|----|----------|----------|----------|----------|----------|----------|
| C  | 1.191476 | 0.224242 | -0.13921 | 172.0229 | 247.744  | 282.5063 |
| C  | 1.624034 | -1.02493 | 0.099312 | 293.2509 | 316.3831 | 333.9981 |
| H  | 0.916188 | -1.82745 | 0.234737 | 356.7628 | 387.8253 | 410.1583 |
| H  | 0.984727 | 0.045241 | -2.16352 | 462.4054 | 611.583  | 641.2    |
| F  | -0.50329 | 1.717791 | -0.77338 | 777.4462 | 858.2861 | 929.8723 |
| F  | 2.077937 | 1.23413  | -0.22628 | 1043.667 | 1099.15  | 1188.051 |
| F  | -0.30677 | 1.274225 | 1.331322 | 1247.87  | 1304.988 | 1361.709 |
| Br | -1.58801 | -0.66187 | -0.06597 | 1717.498 | 3220.816 | 3831.387 |
| O  | 2.94054  | -1.30557 | 0.094093 |          |          |          |
| H  | 3.080047 | -2.25245 | 0.188222 |          |          |          |

#### M4-TSa4

| Cartessian coordinates: |          |          |          | Frequencies (cm-1): |          |          |
|-------------------------|----------|----------|----------|---------------------|----------|----------|
| C                       | 0.14439  | -0.69423 | 0.159494 | -666.316            | 26.7941  | 82.4191  |
| C                       | -1.0788  | 0.045729 | -0.2286  | 118.662             | 155.7436 | 173.855  |
| C                       | -1.36572 | 1.307518 | 0.144352 | 282.6971            | 295.0503 | 345.9322 |
| H                       | -0.5902  | 1.97643  | 0.503755 | 388.1883            | 438.1465 | 490.5782 |
| H                       | -1.9052  | -0.60547 | -0.73821 | 577.8624            | 634.7935 | 669.7867 |
| F                       | 0.294143 | -1.81085 | -0.56208 | 954.6031            | 962.6644 | 1110.02  |
| F                       | -2.93649 | -1.34238 | -0.3441  | 1149.205            | 1179.376 | 1272.707 |
| F                       | 0.164849 | -1.05102 | 1.459497 | 1301.004            | 1346.462 | 1658.681 |
| Br                      | 1.770028 | 0.437846 | -0.16231 | 1952.359            | 3145.573 | 3802.983 |
| O                       | -2.59317 | 1.80629  | 0.026559 |                     |          |          |
| H                       | -2.61197 | 2.738171 | 0.271496 |                     |          |          |

#### M5-TSa1

| Cartessian coordinates: |          |          |          | Frequencies (cm-1): |          |          |
|-------------------------|----------|----------|----------|---------------------|----------|----------|
| C                       | 1.100949 | -0.70427 | -0.00257 | -687.495            | 66.5122  | 88.9654  |
| C                       | 0.116216 | 0.334973 | -0.54238 | 155.3913            | 176.6316 | 224.4872 |
| C                       | 0.451025 | 1.789665 | -0.17587 | 298.5385            | 333.1031 | 379.6552 |
| H                       | -0.37488 | 1.766407 | 1.55012  | 392.98              | 511.8796 | 519.4024 |
| H                       | -0.38778 | 2.486954 | -0.34664 | 839.3873            | 948.0617 | 1014.158 |
| F                       | 1.238534 | -0.63553 | 1.327477 | 1122.067            | 1154.775 | 1189.802 |
| F                       | 2.307042 | -0.51948 | -0.56261 | 1246.76             | 1324.25  | 1393.8   |
| F                       | 0.706821 | -1.95274 | -0.31142 | 1716.683            | 2930.225 | 3093.806 |
| Br                      | -1.72085 | -0.0689  | 0.005855 | -687.495            | 66.5122  | 88.9654  |
| O                       | 1.574031 | 2.169135 | 0.058015 |                     |          |          |
| H                       | 0.119446 | 0.252768 | -1.62866 |                     |          |          |

#### M5-TSa2

| Cartessian coordinates: |          |          |          | Frequencies (cm-1): |          |          |
|-------------------------|----------|----------|----------|---------------------|----------|----------|
| C                       | 0.976807 | -0.86848 | -0.00254 | -431.383            | 31.7325  | 82.8439  |
| C                       | 0.071247 | 0.229916 | -0.51396 | 133.4322            | 151.12   | 192.9254 |
| C                       | 0.764848 | 2.023371 | 0.282484 | 277.1866            | 311.4034 | 402.2345 |
| H                       | 0.652812 | 1.675728 | 1.32096  | 515.1684            | 557.9271 | 606.6994 |
| H                       | -0.09436 | 2.579116 | -0.12281 | 676.3534            | 731.6413 | 854.3531 |
| F                       | 1.044733 | -0.89624 | 1.337697 | 880.4197            | 1101.302 | 1123.492 |
| F                       | 2.214018 | -0.71286 | -0.48555 | 1146.108            | 1228.734 | 1236.113 |
| F                       | 0.535203 | -2.08061 | -0.40708 | 1299.62             | 1436.231 | 1580.888 |
| Br                      | -1.74077 | 0.084824 | -0.0132  | 2916.895            | 2984.51  | 3198.761 |
| O                       | 1.8926   | 2.152023 | -0.22206 |                     |          |          |
| H                       | 0.204733 | 0.458705 | -1.56128 |                     |          |          |

### M5-TSa3

| Cartessian coordinates: |          |          |          | Frequencies (cm-1): |          |          |
|-------------------------|----------|----------|----------|---------------------|----------|----------|
| C                       | -1.44458 | -0.40238 | -0.00268 | -554.309            | 59.4925  | 117.6331 |
| C                       | 0.306212 | 0.65501  | 0.602068 | 141.7035            | 261.5611 | 294.6988 |
| C                       | -0.18407 | 1.892969 | -0.0294  | 341.9743            | 358.6878 | 487.6005 |
| H                       | 0.202132 | 2.041255 | -1.04154 | 523.2753            | 561.757  | 664.2571 |
| H                       | -0.01192 | 2.788794 | 0.574037 | 713.7844            | 858.0722 | 917.9839 |
| F                       | -0.96948 | -1.48497 | 0.67696  | 1016.644            | 1042.543 | 1074.849 |
| F                       | -1.25062 | -0.61725 | -1.29695 | 1148.749            | 1183.995 | 1203.345 |
| F                       | -2.74323 | -0.40803 | 0.278211 | 1255.764            | 1343.176 | 1509.635 |
| Br                      | 1.84387  | -0.22287 | -0.04585 | 3009.586            | 3052.384 | 3199.934 |
| O                       | -1.53655 | 1.518626 | 0.00762  |                     |          |          |
| H                       | 0.171378 | 0.540018 | 1.667266 |                     |          |          |

### Ma1

| Cartessian coordinates: |          |          |          | Frequencies (cm-1): |          |          |
|-------------------------|----------|----------|----------|---------------------|----------|----------|
| C                       | 1.429408 | -0.1514  | -0.04357 | 17.5621             | 39.7177  | 126.856  |
| C                       | 0.036019 | 0.382414 | 0.030396 | 172.2197            | 177.7481 | 248.7508 |
| C                       | -0.2365  | 1.786065 | 0.442946 | 313.9544            | 343.2575 | 417.3095 |
| H                       | 0.701174 | 2.347231 | 0.410068 | 520.8726            | 558.5096 | 612.0288 |
| H                       | -0.60235 | 1.797327 | 1.478007 | 697.0492            | 873.0353 | 1009.634 |
| F                       | 1.914985 | -0.47819 | 1.185455 | 1044.742            | 1074.642 | 1115.382 |
| F                       | 2.269872 | 0.777861 | -0.54867 | 1174.274            | 1218.483 | 1273.042 |
| F                       | 1.532722 | -1.24914 | -0.80512 | 1325.679            | 1438.181 | 1492.745 |
| Br                      | -1.36289 | -0.84849 | 0.01442  | 2966.977            | 3039.051 | 3822.183 |
| O                       | -1.20562 | 2.357687 | -0.43103 |                     |          |          |

|                         |          |          |          |                     |          |          |
|-------------------------|----------|----------|----------|---------------------|----------|----------|
| H                       | -1.58436 | 3.13396  | -0.0081  |                     |          |          |
| <hr/>                   |          |          |          |                     |          |          |
| <b>Ma2</b>              |          |          |          |                     |          |          |
| Cartessian coordinates: |          |          |          | Frequencies (cm-1): |          |          |
| C                       | -1.38492 | -0.36633 | -0.03159 | 61.7537             | 110.4965 | 137.8845 |
| C                       | -0.19817 | 0.507372 | -0.40812 | 176.8366            | 202.2206 | 256.2911 |
| C                       | -0.13162 | 1.733451 | 0.317302 | 369.5204            | 389.346  | 409.8392 |
| H                       | -0.38384 | 1.799337 | 1.369898 | 477.0864            | 544.0457 | 583.0582 |
| H                       | -0.12067 | 0.61979  | -1.48704 | 628.8829            | 686.3065 | 860.8485 |
| F                       | -2.5349  | 0.23674  | -0.44123 | 1057.905            | 1100.407 | 1126.967 |
| F                       | -1.48632 | -0.54322 | 1.305764 | 1159.868            | 1250.357 | 1275.063 |
| F                       | -1.35181 | -1.57598 | -0.61451 | 1284.344            | 1355.281 | 1547.722 |
| Br                      | 1.555959 | -0.63864 | 0.012156 | 3185.875            | 3219.499 | 3834.147 |
| O                       | 0.508623 | 2.766054 | -0.27142 |                     |          |          |
| H                       | 0.622454 | 3.499992 | 0.3472   |                     |          |          |
| <hr/>                   |          |          |          |                     |          |          |
| <b>Ma3</b>              |          |          |          |                     |          |          |
| Cartessian coordinates: |          |          |          | Frequencies (cm-1): |          |          |
| C                       | 1.478294 | -0.41079 | -0.36294 | 53.8645             | 107.1046 | 154.4144 |
| C                       | 0.271473 | 0.33152  | 0.133061 | 165.9696            | 231.7516 | 279.5071 |
| C                       | 0.095193 | 1.686102 | -0.55479 | 308.7305            | 314.0813 | 373.7198 |
| H                       | -0.03419 | 1.529748 | -1.62355 | 392.5372            | 570.3285 | 606.8638 |
| H                       | 1.020392 | 2.248997 | -0.3935  | 718.3118            | 831.3299 | 956.4836 |
| F                       | 0.393743 | 0.563221 | 1.500777 | 1028.897            | 1069.687 | 1122.026 |
| F                       | 2.59494  | 0.31619  | -0.44533 | 1218.658            | 1240.9   | 1322.077 |
| F                       | 1.732511 | -1.58636 | 0.184587 | 1386.182            | 1418.856 | 1489.487 |
| Br                      | -1.29703 | -0.82156 | -0.12951 | 3016.476            | 3113.862 | 3802.713 |
| O                       | -1.02863 | 2.389744 | -0.09341 |                     |          |          |
| H                       | -0.92159 | 2.579276 | 0.844879 |                     |          |          |
| <hr/>                   |          |          |          |                     |          |          |
| <b>Ma4</b>              |          |          |          |                     |          |          |
| Cartessian coordinates: |          |          |          | Frequencies (cm-1): |          |          |
| C                       | 0.185708 | -0.74676 | 0.105297 | 62.91               | 79.5082  | 164.9603 |
| C                       | -1.17702 | -0.24728 | -0.38467 | 200.4263            | 275.0545 | 286.8151 |
| C                       | -1.73157 | 0.825644 | 0.441514 | 308.2044            | 315.5435 | 362.5271 |
| H                       | -1.71821 | 0.799733 | 1.52046  | 391.5149            | 458.7533 | 545.488  |
| H                       | -1.08222 | 0.068028 | -1.42311 | 600.6979            | 812.224  | 897.806  |
| F                       | 0.581585 | -1.81781 | -0.59705 | 924.9593            | 1067.392 | 1113.437 |
| F                       | -2.02018 | -1.39207 | -0.38982 | 1210.14             | 1235.078 | 1247.716 |

|    |          |          |          |          |          |          |
|----|----------|----------|----------|----------|----------|----------|
| F  | 0.138034 | -1.10604 | 1.402097 | 1319.978 | 1341.778 | 1499.159 |
| Br | 1.552537 | 0.663528 | -0.1044  | 3096.665 | 3205.855 | 3820.201 |
| O  | -2.56742 | 1.682598 | -0.19767 |          |          |          |
| H  | -2.95678 | 2.301639 | 0.428067 |          |          |          |

### Ma5

| Cartessian coordinates: |          |          |          | Frequencies (cm-1): |          |          |
|-------------------------|----------|----------|----------|---------------------|----------|----------|
| C                       | 1.024985 | -0.79019 | -0.00659 | 50.9552             | 105.944  | 152.3862 |
| C                       | 0.159877 | 0.398765 | -0.41572 | 185.8396            | 223.1784 | 300.0136 |
| C                       | 0.574919 | 1.709693 | 0.27325  | 338.3453            | 434.6866 | 526.054  |
| H                       | 0.653775 | 1.582719 | 1.364719 | 558.9932            | 576.4312 | 682.3103 |
| H                       | -0.23478 | 2.4516   | 0.153321 | 771.1392            | 830.14   | 1027.3   |
| F                       | 0.964487 | -1.03402 | 1.31493  | 1065.193            | 1090.935 | 1131.636 |
| F                       | 2.31371  | -0.53782 | -0.30845 | 1176.433            | 1204.406 | 1249.965 |
| F                       | 0.674404 | -1.9142  | -0.64972 | 1322.769            | 1364.071 | 1385.154 |
| Br                      | -1.72538 | 0.019959 | -0.01598 | 2912.26             | 2949.918 | 3131.327 |
| O                       | 1.701018 | 2.278295 | -0.22266 |                     |          |          |
| H                       | 0.228968 | 0.505533 | -1.49402 |                     |          |          |

### CF<sub>3</sub>CBr=CH<sub>2</sub>

| Cartessian coordinates: |          |          |          | Frequencies (cm-1): |          |          |
|-------------------------|----------|----------|----------|---------------------|----------|----------|
| C                       | 1.539897 | -0.1639  | -0.00034 | 45.1484             | 138.4317 | 149.8831 |
| C                       | 0.290431 | 0.395245 | -0.00012 | 166.3446            | 175.26   | 302.357  |
| C                       | 0.070904 | 1.763729 | -0.00019 | 350.3164            | 425.9534 | 433.4728 |
| H                       | 2.645781 | 0.574462 | 0.000259 | 566.8506            | 602.4441 | 629.1592 |
| H                       | 1.816049 | -1.45234 | 0.000011 | 972.5421            | 1118.501 | 1248.787 |
| F                       | -1.19341 | -0.79604 | 0.000023 | 1278.403            | 1300.82  | 1523.364 |
| F                       | 0.900632 | 2.454996 | -0.00062 | 1548.647            | 3197.516 | 3837.486 |
| F                       | -1.19196 | 2.264005 | 0.000142 | 45.1484             | 138.4317 | 149.8831 |
| Br                      | -1.15929 | 3.224717 | 0.000106 |                     |          |          |

### CF<sub>2</sub>CFCH<sub>2</sub>OH

| Cartessian coordinates: |          |          |          | Frequencies (cm-1): |          |          |
|-------------------------|----------|----------|----------|---------------------|----------|----------|
| C                       | -1.04398 | -0.16332 | -0.00555 | 80.613              | 138.3389 | 209.3683 |
| C                       | 0.180935 | 0.294758 | 0.201108 | 250.6092            | 302.934  | 357.6819 |
| C                       | 1.405792 | -0.49875 | 0.484022 | 250.6092            | 302.934  | 357.6819 |
| H                       | 1.139373 | -1.54508 | 0.61156  | 656.7693            | 784.7321 | 937.8697 |
| H                       | 1.850075 | -0.14307 | 1.42039  | 1029.65             | 1115.695 | 1226.384 |
| F                       | 0.373657 | 1.63608  | 0.138867 | 1256.363            | 1304.627 | 1368.748 |

|   |          |          |          |          |          |          |
|---|----------|----------|----------|----------|----------|----------|
| F | -1.36252 | -1.44675 | 0.017692 | 1414.864 | 1484.908 | 1831.994 |
| F | -2.09706 | 0.590037 | -0.25001 | 3002.778 | 3120.661 | 3810.276 |
| O | 2.357385 | -0.44755 | -0.57447 |          |          |          |
| H | 2.668322 | 0.458143 | -0.67267 |          |          |          |

---

### CF<sub>2</sub>CBrCHOH

| Cartesian coordinates: |          |          |          | Frequencies (cm-1): |          |          |
|------------------------|----------|----------|----------|---------------------|----------|----------|
| C                      | 0.947325 | 0.964388 | 0.000121 | 65.334              | 169.4045 | 182.0441 |
| C                      | 0.295064 | -0.23641 | -8.5E-05 | 204.5475            | 241.5056 | 298.9344 |
| C                      | 0.857176 | -1.50673 | -1.6E-05 | 350.8811            | 381.0417 | 441.703  |
| H                      | 0.23329  | -2.38602 | -0.00018 | 524.48              | 580.1381 | 733.5709 |
| F                      | 2.262901 | 1.089812 | -0.00033 | 963.0423            | 1110.557 | 1240.603 |
| F                      | 0.354722 | 2.144885 | 0.000252 | 1282.543            | 1300.29  | 1502.46  |
| Br                     | -1.61385 | -0.17546 | -2.8E-05 | 1554.194            | 3217.696 | 3834.494 |
| O                      | 2.208804 | -1.66401 | 0.000188 |                     |          |          |
| H                      | 2.424923 | -2.60075 | 0.000253 |                     |          |          |

---

### CF<sub>2</sub>=CFBr

| Cartesian coordinates: |          |          |   | Frequencies (cm-1): |          |          |
|------------------------|----------|----------|---|---------------------|----------|----------|
| C                      | -1.323   | 0.526546 | 0 | 155.7051            | 161.2933 | 313.9796 |
| C                      | 0        | 0.590286 | 0 | 361.6703            | 363.8344 | 510.8666 |
| F                      | 0.612576 | 1.775739 | 0 | 575.2614            | 669.4799 | 1025.942 |
| F                      | -2.10105 | 1.590964 | 0 | 1189.808            | 1312.428 | 1818.717 |
| F                      | -2.01407 | -0.59317 | 0 |                     |          |          |
| Br                     | 1.127454 | -0.90465 | 0 |                     |          |          |

---

### CH<sub>2</sub>OH

| Cartesian coordinates: |          |          |          | Frequencies (cm-1): |          |          |
|------------------------|----------|----------|----------|---------------------|----------|----------|
| C                      | 0.684488 | 0.027498 | 0.056724 | 407.0037            | 520.1112 | 1052.192 |
| H                      | 1.237275 | -0.88499 | -0.09256 | 1198.606            | 1356.178 | 1482.022 |
| H                      | 1.117083 | 0.996573 | -0.14708 | 3134.488            | 3274.465 | 3823.177 |
| O                      | -0.66976 | -0.12583 | -0.01882 |                     |          |          |
| H                      | -1.10321 | 0.730053 | 0.049817 |                     |          |          |

---

### CF<sub>3</sub>CHCHOH

| Cartesian coordinates: |          |          |          | Frequencies (cm-1): |          |          |
|------------------------|----------|----------|----------|---------------------|----------|----------|
| C                      | 0.851929 | -0.03163 | 0.000035 | 85.8215             | 190.2474 | 200.3249 |
| C                      | -0.53703 | -0.54954 | -0.00015 | 363.8575            | 397.1649 | 409.439  |
| C                      | -1.59332 | 0.254981 | -5.1E-05 | 418.5294            | 553.311  | 574.9449 |

|   |          |          |          |          |          |          |
|---|----------|----------|----------|----------|----------|----------|
| H | -1.48862 | 1.332577 | 0.000218 | 689.2092 | 852.5275 | 873.7715 |
| H | -0.64145 | -1.62487 | -0.00034 | 975.1948 | 1083.944 | 1098.984 |
| F | 1.549848 | -0.45717 | -1.08201 | 1168.801 | 1233.966 | 1280.702 |
| F | 1.54989  | -0.45779 | 1.081615 | 1359.96  | 1386.693 | 1754.138 |
| F | 0.916173 | 1.319132 | 0.000456 | 3176.749 | 3204.002 | 3838.962 |
| O | -2.85617 | -0.23418 | 0.000444 |          |          |          |
| H | -3.49329 | 0.485297 | -0.003   |          |          |          |

### CHBr=CHOH

| Cartesian coordinates: |          |          |   | Frequencies (cm-1): |          |          |
|------------------------|----------|----------|---|---------------------|----------|----------|
| C                      | -0.3381  | 0.75546  | 0 | 186.7358            | 241.8043 | 292.0473 |
| C                      | 0.835541 | 1.43306  | 0 | 380.432             | 778.2381 | 790.7629 |
| C                      | 1.762188 | 0.89806  | 0 | 934.9846            | 1139.408 | 1169.589 |
| H                      | -1.26474 | 1.29046  | 0 | 1298.003            | 1346.406 | 1710.213 |
| H                      | -0.3381  | -1.15454 | 0 | 3171.279            | 3226.118 | 3845.071 |
| F                      | 0.835541 | 2.73436  | 0 |                     |          |          |
| F                      | 1.666926 | 3.21436  | 0 |                     |          |          |

### CF<sub>3</sub>CBrCHOH

| Cartesian coordinates: |          |          |          | Frequencies (cm-1): |          |          |
|------------------------|----------|----------|----------|---------------------|----------|----------|
| C                      | -1.43963 | -0.0986  | 0.000073 | 45.1731             | 157.4651 | 163.4398 |
| C                      | -0.04706 | 0.449077 | 0.000171 | 179.8801            | 322.1437 | 327.9829 |
| C                      | 0.190805 | 1.759085 | 0.000042 | 398.1035            | 411.968  | 479.0246 |
| H                      | -0.63775 | 2.45481  | 0.000557 | 529.9147            | 606.0013 | 610.5548 |
| F                      | -1.68755 | -0.86405 | -1.08161 | 715.4981            | 906.0356 | 944.7942 |
| F                      | -2.35917 | 0.894241 | 0.000307 | 1118.952            | 1125.559 | 1185.487 |
| F                      | -1.68789 | -0.86496 | 1.080978 | 1118.952            | 1125.559 | 1185.487 |
| Br                     | 1.346829 | -0.82923 | -7E-06   | 1118.952            | 1125.559 | 1185.487 |
| O                      | 1.435917 | 2.273656 | 0.000527 |                     |          |          |
| H                      | 1.398075 | 3.234534 | -0.00327 |                     |          |          |

### CF<sub>2</sub>BrCFCHOH

| Cartesian coordinates: |          |          |          | Frequencies (cm-1): |          |          |
|------------------------|----------|----------|----------|---------------------|----------|----------|
| C                      | -0.56319 | 0.410227 | 0.000156 | 50.3604             | 145.7951 | 165.7014 |
| C                      | 0.514972 | -0.35705 | 0.000001 | 251.7876            | 280.9168 | 297.5974 |
| C                      | 0.430171 | -1.43621 | -0.00016 | 313.0403            | 318.9049 | 400.2178 |
| H                      | -0.57748 | 1.489215 | 0.000302 | 436.2026            | 624.4495 | 632.9413 |
| F                      | -1.79496 | -0.15457 | -5.4E-05 | 781.3029            | 880.1614 | 937.9186 |
| F                      | 1.770429 | 0.190903 | -0.00026 | 1044.066            | 1079.475 | 1180.863 |

|    |          |          |          |          |          |          |
|----|----------|----------|----------|----------|----------|----------|
| F  | 2.427819 | -0.50813 | 0.001455 | 1249.441 | 1315.648 | 1369.569 |
| Br | -0.56319 | 0.410227 | 0.000156 | 1783.765 | 3224.605 | 3839.7   |
| O  | 0.514972 | -0.35705 | 0.000001 |          |          |          |
| H  | 0.430171 | -1.43621 | -0.00016 |          |          |          |

---

### CHF=CHOH

| Cartessian coordinates: |          |          |          | Frequencies (cm-1): |          |          |
|-------------------------|----------|----------|----------|---------------------|----------|----------|
| C                       | -0.56319 | 0.410227 | 0.000156 | 45.3766             | 138.4117 | 149.8244 |
| C                       | 0.514972 | -0.35705 | 0.000001 | 166.3424            | 175.2553 | 302.2411 |
| H                       | 0.430171 | -1.43621 | -0.00016 | 350.3071            | 425.9688 | 433.4725 |
| H                       | -0.57748 | 1.489215 | 0.000302 | 566.8421            | 602.4306 | 629.1523 |
| F                       | -1.79496 | -0.15457 | -5.4E-05 | 972.5443            | 1118.499 | 1248.795 |
| O                       | 1.770429 | 0.190903 | -0.00026 |                     |          |          |
| H                       | 2.427819 | -0.50813 | 0.001455 |                     |          |          |

---

### CF<sub>2</sub>BrCCHOH

| Cartessian coordinates: |          |          |          | Frequencies (cm-1): |          |          |
|-------------------------|----------|----------|----------|---------------------|----------|----------|
| C                       | 0.105712 | 0.875029 | -2.2E-05 | 91.53               | 103.2599 | 154.306  |
| C                       | -1.28353 | 0.514012 | 0.000205 | 271.8045            | 280.0914 | 285.8816 |
| C                       | -2.0911  | -0.51696 | 0.000066 | 373.2464            | 409.3383 | 528.0406 |
| H                       | -1.68435 | -1.52673 | -0.00016 | 610.2231            | 633.7328 | 860.8122 |
| F                       | 0.47335  | 1.591119 | 1.082744 | 861.784             | 1088.466 | 1089.27  |
| F                       | 0.47344  | 1.590867 | -1.08281 | 1237.885            | 1257.288 | 1377.858 |
| Br                      | 1.261392 | -0.79606 | 0.00001  | 1796.402            | 3095.191 | 3826.96  |
| O                       | -3.44107 | -0.40086 | -0.00047 |                     |          |          |
| H                       | -3.84344 | -1.27462 | 0.002601 |                     |          |          |

---

### CF<sub>2</sub>CBrCH<sub>2</sub>O

| Cartessian coordinates: |          |          |          | Frequencies (cm-1): |          |          |
|-------------------------|----------|----------|----------|---------------------|----------|----------|
| C                       | -1.36354 | -0.5579  | -0.00128 | 56.6278             | 135.1066 | 163.9589 |
| C                       | -0.33242 | 0.258623 | 0.150287 | 199.061             | 275.3872 | 366.5076 |
| C                       | -0.48289 | 1.734336 | 0.405403 | 449.7131            | 577.7914 | 606.7667 |
| H                       | 0.057235 | 2.020377 | 1.327266 | 628.7629            | 683.9713 | 952.8937 |
| H                       | -1.53294 | 1.985633 | 0.62136  | 1037.713            | 1128.367 | 1166.703 |
| F                       | -2.62726 | -0.16205 | 0.065991 | 1278.341            | 1326.042 | 1374.716 |
| F                       | -1.30437 | -1.85058 | -0.22977 | 1772.483            | 2896.566 | 2954.308 |
| Br                      | 1.429692 | -0.42728 | 0.022834 |                     |          |          |
| O                       | -0.01323 | 2.556508 | -0.57503 |                     |          |          |

---



**CF<sub>2</sub>CHBrCHO**

Cartessian coordinates:

|    |          |          |          |
|----|----------|----------|----------|
| C  | -1.1542  | -0.7947  | -0.04571 |
| C  | -0.25712 | 0.397535 | -0.42706 |
| C  | -0.61806 | 1.516463 | 0.335595 |
| H  | 0.09951  | 1.977739 | 0.981519 |
| H  | -0.3813  | 0.619215 | -1.46645 |
| F  | -0.77977 | -1.63129 | 0.945459 |
| F  | -2.31503 | -1.00324 | -0.70258 |
| Br | 1.569103 | -0.04451 | -0.08411 |
| O  | -1.82591 | 1.994479 | 0.258223 |

Frequencies (cm-1):

|          |          |          |
|----------|----------|----------|
| 52.1761  | 66.522   | 152.0553 |
| 200.0489 | 251.063  | 305.6448 |
| 437.3467 | 537.7201 | 572.1457 |
| 704.0946 | 856.4276 | 1012.785 |
| 1014.963 | 1146.423 | 1184.21  |
| 1271.433 | 1322.489 | 1401.729 |
| 1798.806 | 2959.121 | 3149.479 |

**CF<sub>2</sub>BrCH=CHO**

Cartessian coordinates:

|    |          |          |          |
|----|----------|----------|----------|
| C  | 0.016785 | 0.762764 | -0.03904 |
| C  | 1.251649 | 0.151773 | -0.55432 |
| C  | 2.299323 | -0.34947 | 0.282966 |
| H  | 2.172833 | -0.24541 | 1.370284 |
| H  | 1.329587 | 0.035076 | -1.62594 |
| F  | -0.43808 | 1.750217 | -0.83048 |
| F  | 0.139072 | 1.253078 | 1.206378 |
| Br | -1.39071 | -0.66493 | 0.007013 |
| O  | 3.307116 | -0.86715 | -0.18882 |

Frequencies (cm-1):

|          |          |          |
|----------|----------|----------|
| 58.4258  | 131.9985 | 187.8718 |
| 260.6586 | 284.9218 | 299.9715 |
| 401.0355 | 475.8345 | 590.2953 |
| 676.4868 | 753.3796 | 900.9328 |
| 977.1824 | 1105.692 | 1142.717 |
| 1236.735 | 1335.396 | 1446.112 |
| 1578.158 | 2987.537 | 3208.418 |

**CF<sub>3</sub>CHBrCHO**

Cartessian coordinates:

|    |          |          |          |
|----|----------|----------|----------|
| C  | -1.53992 | -0.16387 | -0.00046 |
| C  | -0.29044 | 0.395239 | -0.00013 |
| C  | -0.07092 | 1.763748 | -0.00016 |
| H  | -0.90067 | 2.454984 | -0.00075 |
| F  | -2.64582 | 0.574414 | 0.000248 |
| F  | -1.81603 | -1.45237 | 0.000109 |
| F  | 1.193433 | -0.79603 | 0.000011 |
| Br | 1.191934 | 2.264013 | 0.000208 |
| O  | 1.159277 | 3.224721 | 0.000031 |
| H  | -1.53992 | -0.16387 | -0.00046 |

Frequencies (cm-1):

|          |          |          |
|----------|----------|----------|
| 71.5559  | 90.0298  | 145.494  |
| 176.777  | 249.4239 | 299.9904 |
| 328.1763 | 507.2021 | 517.7896 |
| 572.6975 | 674.9294 | 756.0676 |
| 851.7371 | 937.4115 | 1030.257 |
| 1120.817 | 1147.163 | 1188.375 |
| 1261.944 | 1348.665 | 1422.871 |
| 1815.879 | 2935.837 | 3105.808 |

**CF<sub>3</sub>CHBr**

Cartessian coordinates:

Frequencies (cm-1):

|    |          |          |          |          |          |          |
|----|----------|----------|----------|----------|----------|----------|
| C  | 1.314649 | -0.02321 | -0.0046  | 32.2057  | 152.3264 | 214.6461 |
| C  | 0.061944 | -0.81929 | -0.02854 | 319.2675 | 403.7047 | 519.0662 |
| F  | 1.375245 | 0.887972 | -0.99695 | 561.2973 | 640.4064 | 770.0341 |
| F  | 2.373377 | -0.8474  | -0.13842 | 890.9571 | 1092.007 | 1111.741 |
| F  | 1.480599 | 0.660035 | 1.152173 | 1220.116 | 1322.979 | 3248.014 |
| Br | -1.58337 | 0.01835  | 0.000248 |          |          |          |
| H  | 0.095422 | -1.89271 | 0.038936 |          |          |          |

### CH<sub>2</sub>O

| Cartessian coordinates: |   |          |          | Frequencies (cm-1): |          |          |
|-------------------------|---|----------|----------|---------------------|----------|----------|
| C                       | 0 | 0        | -0.527   | 1198.207            | 1263.298 | 1530.126 |
| H                       | 0 | 0.938574 | -1.11187 | 1813.364            | 2884.677 | 2939.649 |
| H                       | 0 | -0.93857 | -1.11187 |                     |          |          |
| O                       | 0 | 0        | 0.673215 |                     |          |          |

### cCH<sub>2</sub>CHBrO

| Cartessian coordinates: |          |          |          | Frequencies (cm-1): |          |          |
|-------------------------|----------|----------|----------|---------------------|----------|----------|
| C                       | -0.83967 | 0.173163 | 0.533439 | 291.0316            | 327.477  | 551.332  |
| C                       | -1.88    | -0.67714 | -0.02759 | 814.4449            | 911.3898 | 1008.073 |
| H                       | -2.7626  | -0.91036 | 0.556465 | 1088.287            | 1155.183 | 1167.035 |
| H                       | -1.61791 | -1.37132 | -0.81561 | 1271.811            | 1326.998 | 1517.02  |
| Br                      | 1.012398 | -0.02898 | -0.03703 | 3104.323            | 3166.372 | 3200.781 |
| O                       | -1.73377 | 0.720202 | -0.37792 |                     |          |          |
| H                       | -0.86527 | 0.558248 | 1.543537 |                     |          |          |

### CF<sub>3</sub>COHCH<sub>2</sub>

| Cartessian coordinates: |          |          |          | Frequencies (cm-1): |          |          |
|-------------------------|----------|----------|----------|---------------------|----------|----------|
| C                       | 0.589626 | 0.021278 | -5.2E-05 | 60.8991             | 246.9012 | 252.4536 |
| C                       | -0.92303 | 0.05206  | -3.5E-05 | 362.8843            | 380.454  | 419.1826 |
| C                       | -1.62337 | 1.177985 | -4.7E-05 | 500.6948            | 575.3026 | 602.2785 |
| H                       | -1.12681 | 2.133108 | -0.00014 | 690.7431            | 729.8111 | 785.3396 |
| H                       | -2.70461 | 1.164216 | 0.000048 | 879.7083            | 979.1683 | 1127.113 |
| F                       | 1.064247 | -0.62108 | 1.084509 | 1136.362            | 1168.927 | 1239.923 |
| F                       | 1.114096 | 1.258037 | -0.00061 | 1407.812            | 1454.757 | 1724.478 |
| F                       | 1.064271 | -0.62207 | -1.08393 | 3163.244            | 3267.883 | 3806.796 |
| O                       | -1.40538 | -1.21704 | 0.000089 |                     |          |          |
| H                       | -2.36848 | -1.20293 | 0.000452 |                     |          |          |

### CF<sub>3</sub>CCH<sub>2</sub>

| Cartessian coordinates: |          |          |          | Frequencies (cm-1): |          |          |
|-------------------------|----------|----------|----------|---------------------|----------|----------|
| C                       | 0.371451 | -0.04135 | 0.00001  | 95.3878             | 192.6705 | 322.8984 |
| C                       | -1.01134 | -0.55388 | 0.000054 | 416.2248            | 480.5134 | 545.3308 |
| C                       | -2.21503 | -0.06272 | -2.5E-05 | 591.9791            | 638.8924 | 796.9205 |
| H                       | -3.09446 | -0.69612 | 0.000134 | 942.4897            | 997.8817 | 1104.513 |
| H                       | -2.38292 | 1.013779 | -7.5E-05 | 1133.182            | 1206.942 | 1412.228 |
| F                       | 0.405267 | 1.314097 | -0.00015 | 1763.048            | 3070.057 | 3169.6   |
| F                       | 1.053309 | -0.4555  | -1.08514 |                     |          |          |
| F                       | 1.0533   | -0.45526 | 1.085248 |                     |          |          |

### CF<sub>3</sub>CBrOH

| Cartessian coordinates: |          |          |          | Frequencies (cm-1): |          |          |
|-------------------------|----------|----------|----------|---------------------|----------|----------|
| C                       | -1.32493 | -0.15453 | -2.6E-05 | 49.6551             | 153.8375 | 219.225  |
| C                       | -0.11508 | 0.752558 | -0.00015 | 289.5565            | 296.7943 | 466.4046 |
| C                       | -0.15298 | 2.041263 | -0.00033 | 475.5963            | 573.4199 | 627.477  |
| H                       | 0.455624 | 2.924716 | -0.00073 | 655.7091            | 714.8985 | 727.8069 |
| H                       | -1.34325 | -0.94932 | -1.08353 | 859.1136            | 1144.42  | 1166.672 |
| F                       | -2.45898 | 0.562627 | -0.00018 | 1230.296            | 1697.829 | 3309.808 |
| F                       | -1.34338 | -0.94911 | 1.083476 |                     |          |          |
| F                       | 1.583221 | -0.19252 | 0.000167 |                     |          |          |

### CF<sub>2</sub>OHCB<sub>2</sub>CH<sub>2</sub>

| Cartessian coordinates: |          |          |          | Frequencies (cm-1): |          |          |
|-------------------------|----------|----------|----------|---------------------|----------|----------|
| C                       | -1.29442 | -0.22746 | 0.00185  | 51.8169             | 169.3982 | 173.6756 |
| C                       | -0.09456 | 0.705419 | 0.007144 | 235.3719            | 326.8959 | 342.464  |
| C                       | -0.18126 | 2.024067 | 0.03423  | 475.6619            | 486.804  | 573.2723 |
| H                       | -1.15082 | 2.500354 | 0.033768 | 618.3488            | 686.2747 | 735.1748 |
| H                       | 0.698439 | 2.649137 | 0.050489 | 820.354             | 969.7458 | 1047.344 |
| F                       | -1.296   | -0.9975  | -1.10753 | 1061.694            | 1154.285 | 1233.733 |
| F                       | -2.43703 | 0.533003 | -0.0591  | 1349.519            | 1428.067 | 1685.327 |
| Br                      | 1.58725  | -0.19129 | -0.00638 | 3163.676            | 3253.346 | 3808.375 |
| O                       | -1.36292 | -1.08461 | 1.062343 |                     |          |          |
| H                       | -1.17934 | -0.60928 | 1.880583 |                     |          |          |

### CF<sub>2</sub>CBrCH<sub>2</sub>

| Cartessian coordinates: |          |          |   | Frequencies (cm-1): |          |          |
|-------------------------|----------|----------|---|---------------------|----------|----------|
| C                       | 1.34496  | 0.419686 | 0 | 114.1086            | 176.5014 | 263.3053 |
| C                       | 0        | 0.693263 | 0 | 311.5836            | 362.5801 | 460.0463 |
| C                       | -0.53314 | 1.962889 | 0 | 492.8729            | 521.7527 | 644.3169 |

|    |          |          |   |          |          |          |
|----|----------|----------|---|----------|----------|----------|
| H  | 0.120721 | 2.822075 | 0 | 735.0065 | 855.6574 | 1110.307 |
| H  | -1.59881 | 2.116217 | 0 | 1268.754 | 1305.909 | 1480.257 |
| F  | 1.89353  | -0.7743  | 0 | 1535.019 | 3169.586 | 3274.453 |
| F  | 2.260699 | 1.373903 | 0 |          |          |          |
| Br | -1.16517 | -0.82256 | 0 |          |          |          |

---

- Geometries and frequencies of transition states, reactants, intermediates and products involved in the reactions of 2-BTP + OH calculated at B3LYP/aug-cc-pVTZ.

#### TSb1

| Cartessian coordinates: |          |          |          | Frequencies (cm-1): |          |          |
|-------------------------|----------|----------|----------|---------------------|----------|----------|
| C                       | 1.332089 | -0.17479 | -5.6E-05 | -883.076            | 50.0794  | 139.2077 |
| C                       | 0.081133 | 0.683216 | -1.9E-05 | 162.5195            | 224.0962 | 239.0487 |
| C                       | 0.112024 | 1.987532 | -4.7E-05 | 319.7066            | 370.2755 | 478.7585 |
| H                       | 0.946053 | 2.670197 | -9.9E-05 | 480.075             | 578.6518 | 615.3961 |
| H                       | -1.1756  | 2.725494 | -6E-06   | 683.8848            | 732.9088 | 809.1408 |
| F                       | 1.389569 | -0.96671 | 1.083819 | 890.2355            | 966.152  | 1054.744 |
| F                       | 2.439183 | 0.590487 | -0.00013 | 1144.322            | 1159.426 | 1228.337 |
| F                       | 1.38947  | -0.96676 | -1.0839  | 1640.34             | 2372.674 | 3239.667 |
| Br                      | -1.5422  | -0.32658 | 0.000075 |                     |          |          |
| H                       | -1.90892 | 3.145503 | 0.000017 |                     |          |          |

---

#### TSb2

| Cartessian coordinates: |          |          |          | Frequencies (cm-1): |          |          |
|-------------------------|----------|----------|----------|---------------------|----------|----------|
| C                       | 1.25222  | -0.33117 | -1E-06   | -953.934            | 46.1554  | 161.0389 |
| C                       | 0.12894  | 0.681411 | -5E-06   | 162.4946            | 227.3298 | 271.728  |
| C                       | 0.261709 | 1.978525 | -6E-06   | 309.5077            | 387.2133 | 475.1856 |
| H                       | 1.576643 | 2.601527 | 0.000007 | 481.4867            | 577.4302 | 634.1555 |
| H                       | -0.48547 | 2.754904 | -4E-06   | 698.5986            | 746.1799 | 824.1796 |
| F                       | 1.195296 | -1.12466 | 1.083985 | 914.337             | 945.5542 | 1105.483 |
| F                       | 2.453071 | 0.267396 | -2.1E-05 | 1143.288            | 1165.681 | 1243.355 |
| F                       | 1.19528  | -1.1247  | -1.08396 | 1658.131            | 2211.418 | 3244.447 |
| Br                      | -1.6245  | -0.12933 | 0        |                     |          |          |
| H                       | 2.316278 | 3.035305 | 0.000016 |                     |          |          |

---

#### TSb3

| Cartessian coordinates: |          |          |          | Frequencies (cm-1): |          |          |
|-------------------------|----------|----------|----------|---------------------|----------|----------|
| C                       | 1.351848 | -0.23394 | 0.003978 | -493.942            | 51.4587  | 143.7141 |
| C                       | 0.206743 | 0.740265 | -0.00361 | 163.4259            | 198.7626 | 258.8422 |
| C                       | 0.32651  | 2.051231 | 0.025089 | 308.2024            | 351.8751 | 475.8892 |
| H                       | 1.306983 | 2.509783 | 0.037947 | 488.5279            | 571.6679 | 600.0906 |
| H                       | -0.53705 | 2.6998   | 0.03189  | 689.6304            | 716.6866 | 819.831  |
| F                       | 1.315267 | -1.03577 | 1.083942 | 974.5086            | 1071.305 | 1141.733 |
| F                       | 2.538881 | 0.406124 | 0.019521 | 1149.493            | 1149.493 | 1149.493 |
| F                       | 1.339405 | -1.02582 | -1.08385 | 1695.392            | 3145.941 | 3235.622 |
| Br                      | -1.59046 | -0.13455 | -0.02884 |                     |          |          |
| H                       | -3.15634 | -0.94647 | 0.610402 |                     |          |          |

---

#### TSb4

| Cartessian coordinates: |          |          |          | Frequencies (cm-1): |          |          |
|-------------------------|----------|----------|----------|---------------------|----------|----------|
| C                       | 1.29509  | -0.22143 | 0.004599 | -828.093            | 61.3182  | 160.8394 |
| C                       | 0.09084  | 0.697887 | -0.11667 | 258.8471            | 318.7982 | 322.8317 |
| C                       | 0.192085 | 2.017962 | 0.070481 | 388.4003            | 462.321  | 476.0892 |
| H                       | 1.165436 | 2.486484 | 0.094079 | 504.2696            | 578.7277 | 605.772  |
| H                       | -0.68302 | 2.644563 | 0.141635 | 671.4393            | 692.4651 | 823.3318 |
| F                       | 1.405532 | -0.68368 | 1.266366 | 933.7951            | 1088.118 | 1136.637 |
| F                       | 2.431365 | 0.441678 | -0.28004 | 1176.835            | 1253.546 | 1418.772 |
| F                       | 1.231248 | -1.28732 | -0.80266 | 1602.814            | 3163.063 | 3258.398 |
| Br                      | -1.59256 | -0.19849 | 0.012527 |                     |          |          |
| H                       | 0.175698 | 0.613433 | -2.07761 |                     |          |          |

---

#### TSb5

| Cartessian coordinates: |          |          |          | Frequencies (cm-1): |          |          |
|-------------------------|----------|----------|----------|---------------------|----------|----------|
| C                       | -1.28496 | -0.24751 | 0.000519 | -332.931            | 51.4149  | 157.446  |
| C                       | -0.0896  | 0.666664 | -0.1187  | 165.2418            | 178.9859 | 254.4695 |
| C                       | -0.19189 | 1.980841 | -0.27302 | 327.1724            | 341.2093 | 480.702  |
| H                       | -1.16428 | 2.440735 | -0.36902 | 484.872             | 578.7347 | 627.1819 |
| H                       | 0.681946 | 2.603874 | -0.38174 | 692.2849            | 763.4933 | 829.0026 |
| F                       | -1.29085 | -1.1874  | -0.96225 | 964.6729            | 1093.44  | 1140.751 |
| F                       | -2.43656 | 0.44201  | -0.1042  | 1159.531            | 1264.547 | 1427.42  |
| F                       | -1.3064  | -0.88691 | 1.184436 | 1654.39             | 3167.467 | 3259.189 |
| Br                      | 1.583229 | -0.21797 | 0.006032 |                     |          |          |
| H                       | -0.22775 | 2.875063 | 1.824962 |                     |          |          |

---

#### TSb6

| Cartessian coordinates: |          |          |          | Frequencies (cm-1): |          |          |
|-------------------------|----------|----------|----------|---------------------|----------|----------|
| C                       | 1.301037 | -0.13564 | -0.35206 | -717.739            | 78.6221  | 142.7806 |
| C                       | 0.041274 | 0.735253 | -0.10559 | 220.3865            | 227.2196 | 304.2494 |
| C                       | 0.146832 | 2.061447 | -0.06151 | 346.6106            | 376.6324 | 438.2485 |
| H                       | 1.104644 | 2.541017 | -0.20559 | 491.1489            | 591.8468 | 629.4411 |
| H                       | -0.70604 | 2.67319  | 0.186872 | 699.3222            | 904.7148 | 1061.278 |
| F                       | 1.160736 | -0.5157  | 1.435886 | 1089.591            | 1152.874 | 1172.937 |
| F                       | 2.53254  | 0.366905 | -0.1767  | 1236.798            | 1384.298 | 1548.83  |
| F                       | 1.269481 | -1.43892 | -0.65237 | 1800.063            | 3161.64  | 3258.191 |
| Br                      | -1.57504 | -0.20484 | -0.02425 |                     |          |          |
| H                       | 1.127984 | 0.278173 | -1.47895 |                     |          |          |

### TSb7

| Cartessian coordinates: |          |          |          | Frequencies (cm-1): |          |          |
|-------------------------|----------|----------|----------|---------------------|----------|----------|
| C                       | -1.23986 | -0.07564 | -0.21433 | -1530.76            | 57.1724  | 155.4488 |
| C                       | -0.04036 | 0.74062  | 0.003127 | 197.1766            | 271.5111 | 318.9702 |
| C                       | -0.09445 | 2.046827 | 0.246219 | 329.0556            | 348.1664 | 426.7255 |
| H                       | -1.04569 | 2.559278 | 0.249743 | 429.255             | 536.561  | 560.2379 |
| H                       | 0.797135 | 2.620443 | 0.444489 | 654.6539            | 688.3744 | 812.1653 |
| F                       | -1.15452 | -1.04982 | -1.09646 | 942.1762            | 970.2378 | 1114.087 |
| F                       | -2.35737 | 0.606712 | -0.3963  | 1259.98             | 1320.897 | 1431.131 |
| F                       | -1.54343 | -0.89772 | 1.188516 | 1638.69             | 3165.469 | 3258.65  |
| Br                      | 1.598463 | -0.22096 | -0.01014 |                     |          |          |
| H                       | -1.95166 | -1.64964 | 2.188652 |                     |          |          |

### TSb8

| Cartessian coordinates: |          |          |          | Frequencies (cm-1): |          |          |
|-------------------------|----------|----------|----------|---------------------|----------|----------|
| C                       | 1.15655  | -0.33378 | 0.000005 | -1480.25            | 35.1006  | 157.7604 |
| C                       | 0.067329 | 0.669865 | 0        | 221.5927            | 224.0569 | 272.7556 |
| C                       | 0.23616  | 1.979587 | 0.000007 | 334.6157            | 386.5033 | 419.4654 |
| H                       | 1.233198 | 2.393364 | 0.00001  | 467.1594            | 522.5731 | 597.1784 |
| H                       | -0.60698 | 2.653385 | 0.000011 | 621.4347            | 737.0361 | 774.6177 |
| F                       | 1.228998 | -1.08933 | 1.079926 | 983.6575            | 983.8931 | 1111.658 |
| F                       | 2.625436 | 0.463588 | -3.5E-05 | 1231.214            | 1287.978 | 1434.3   |
| F                       | 1.228966 | -1.08938 | -1.07988 | 1696.718            | 3168.818 | 3261.108 |
| Br                      | -1.68477 | -0.12676 | -4E-06   |                     |          |          |
| H                       | 3.829916 | 0.931922 | -7.3E-05 |                     |          |          |

### M1-TSb1

| Cartessian coordinates: | Frequencies (cm-1): |
|-------------------------|---------------------|
|-------------------------|---------------------|

|    |          |          |          |          |          |          |
|----|----------|----------|----------|----------|----------|----------|
| C  | -1.28683 | -0.25173 | -0.01513 | -1915.88 | 55.3431  | 156.5222 |
| C  | -0.10013 | 0.640679 | -0.23759 | 204.7925 | 271.5642 | 300.0365 |
| C  | -0.24901 | 2.074011 | 0.049213 | 359.1825 | 439.6081 | 488.6971 |
| H  | -0.30589 | 1.513096 | -1.15375 | 569.5716 | 615.7528 | 682.5837 |
| H  | 0.640137 | 2.680204 | 0.081693 | 761.564  | 828.0228 | 1054.915 |
| F  | -1.19137 | -1.41705 | -0.67067 | 1091.493 | 1160.647 | 1171.355 |
| F  | -2.41592 | 0.36391  | -0.4388  | 1223.263 | 1325.192 | 1426.791 |
| F  | -1.47178 | -0.5458  | 1.292972 | 2192.453 | 3158.392 | 3281.937 |
| Br | 1.610697 | -0.20094 | 0.005743 |          |          |          |
| H  | -1.18115 | 2.452138 | 0.440535 |          |          |          |

### M1-TSb2

| Cartessian coordinates: |          |          |          | Frequencies (cm-1): |          |          |
|-------------------------|----------|----------|----------|---------------------|----------|----------|
| C                       | 1.247882 | -0.42647 | -0.27381 | -235.618            | 136.4251 | 145.7032 |
| C                       | 0.226028 | 0.479901 | -0.20206 | 173.9763            | 189.7956 | 258.4718 |
| C                       | 0.394003 | 1.922634 | -0.51613 | 285.5734            | 334.3853 | 372.6324 |
| H                       | 1.444794 | 2.199346 | -0.48668 | 508.5766            | 530.7914 | 645.0296 |
| H                       | -0.14322 | 2.513123 | 0.222817 | 902.5816            | 1044.809 | 1132.472 |
| F                       | 0.941549 | 0.467365 | 1.698366 | 1159.39             | 1355.651 | 1418.526 |
| F                       | 2.479303 | -0.08416 | -0.52934 | 1466.417            | 1477.206 | 1653.691 |
| F                       | 1.122828 | -1.70681 | -0.10897 | 3040.677            | 3110.292 | 3142.287 |
| Br                      | -1.52535 | -0.19437 | -0.05203 |                     |          |          |
| H                       | -0.01486 | 2.146446 | -1.50344 |                     |          |          |

### M1-TSb3

| Cartessian coordinates: |          |          |          | Frequencies (cm-1): |          |          |
|-------------------------|----------|----------|----------|---------------------|----------|----------|
| C                       | 1.086219 | -0.68932 | -0.22006 | -921.114            | 62.7487  | 100.0948 |
| C                       | 0.155341 | 0.283847 | -0.46541 | 162.0934            | 179.4107 | 284.2359 |
| C                       | 0.574803 | 1.611386 | -0.86656 | 341.7492            | 370.5447 | 393.291  |
| H                       | 1.094706 | 1.909674 | 0.136945 | 517.3767            | 558.4218 | 644.6838 |
| H                       | -0.2374  | 2.27949  | -1.12658 | 759.4218            | 912.2383 | 1127.74  |
| F                       | 1.659147 | 1.214366 | 1.390279 | 1169.029            | 1254.839 | 1357.718 |
| F                       | 2.315963 | -0.60407 | -0.62664 | 1370.045            | 1471.314 | 1598.918 |
| F                       | 0.83211  | -1.84143 | 0.321114 | 2026.289            | 3083.94  | 3175.157 |
| Br                      | -1.61124 | -0.05593 | 0.061315 |                     |          |          |
| H                       | 1.372995 | 1.613232 | -1.60706 |                     |          |          |

### M2-TSb1

| Cartessian coordinates: |          |          |          | Frequencies (cm-1): |         |          |
|-------------------------|----------|----------|----------|---------------------|---------|----------|
| C                       | 1.406437 | -0.21429 | -0.01376 | -163.202            | 54.9751 | 124.8977 |

|    |          |          |          |          |          |          |
|----|----------|----------|----------|----------|----------|----------|
| C  | 0.385413 | 0.757647 | -0.56742 | 202.9182 | 247.1334 | 391.2222 |
| C  | 0.214983 | 1.986286 | 0.024487 | 427.4542 | 497.8811 | 540.1798 |
| H  | -0.33067 | 2.765325 | -0.48517 | 601.9612 | 633.366  | 805.7232 |
| H  | 0.540031 | 2.167442 | 1.038361 | 895.6449 | 968.798  | 1028.11  |
| F  | 1.43971  | -0.22646 | 1.326416 | 1108.128 | 1189.302 | 1250.484 |
| F  | 2.635743 | 0.168853 | -0.44217 | 1272.153 | 1444.119 | 1544.964 |
| F  | 1.217369 | -1.46582 | -0.44488 | 3163.603 | 3201.051 | 3264.314 |
| Br | -1.71728 | -0.2011  | 0.013168 |          |          |          |
| H  | 0.219057 | 0.638744 | -1.62816 |          |          |          |

### M2-TSb2

| Cartessian coordinates: |          |          |          | Frequencies (cm-1): |          |          |
|-------------------------|----------|----------|----------|---------------------|----------|----------|
| C                       | 1.570701 | -0.21532 | 0.004101 | -372.296            | 23.5249  | 83.3835  |
| C                       | -0.34267 | 0.937174 | -0.52356 | 112.1707            | 158.2566 | 238.4325 |
| C                       | -0.20029 | 2.110182 | 0.126266 | 352.8293            | 485.3377 | 509.7131 |
| H                       | 0.459045 | 2.865285 | -0.28053 | 512.9461            | 591.0124 | 662.5849 |
| H                       | -0.66475 | 2.298929 | 1.082303 | 862.0581            | 921.0037 | 1002.575 |
| F                       | 2.580283 | 0.56557  | -0.37401 | 1025.273            | 1191.734 | 1212.844 |
| F                       | 1.614619 | -1.36507 | -0.66028 | 1258.243            | 1361.653 | 1528.2   |
| F                       | 1.625366 | -0.43237 | 1.309393 | 3146.665            | 3195.715 | 3243.861 |
| Br                      | -1.6658  | -0.339   | 0.018034 |                     |          |          |
| H                       | -0.04022 | 0.795304 | -1.54982 |                     |          |          |

### M2-TSb3

| Cartessian coordinates: |          |          |          | Frequencies (cm-1): |          |          |
|-------------------------|----------|----------|----------|---------------------|----------|----------|
| C                       | 0.861343 | -0.50762 | 0.082894 | -676.676            | 123.0718 | 128.688  |
| C                       | 0.873433 | 0.799734 | -0.5104  | 173.9695            | 230.3196 | 238.4478 |
| C                       | 0.653226 | 1.956602 | 0.230078 | 287.8885            | 351.2298 | 457.3102 |
| H                       | 0.562665 | 2.903136 | -0.27682 | 471.6598            | 506.7037 | 597.3649 |
| H                       | 0.611771 | 1.929043 | 1.306832 | 814.5389            | 839.9806 | 990.7671 |
| F                       | 0.988562 | -0.7005  | 1.344846 | 1056.749            | 1248.345 | 1327.093 |
| F                       | 2.639764 | 0.236509 | -0.33253 | 1433.958            | 1497.31  | 1569.164 |
| F                       | 0.930539 | -1.58271 | -0.61094 | 3180.721            | 3245.067 | 3289.136 |
| Br                      | -1.63887 | -0.02014 | -0.05346 |                     |          |          |
| H                       | 0.828186 | 0.800722 | -1.58667 |                     |          |          |

### M3-TSb1

| Cartessian coordinates: |         |          |          | Frequencies (cm-1): |          |          |
|-------------------------|---------|----------|----------|---------------------|----------|----------|
| C                       | 1.40932 | -0.40004 | -0.06635 | -213.395            | 106.1708 | 109.5722 |



|    |          |          |          |          |          |          |
|----|----------|----------|----------|----------|----------|----------|
| C  | 0.64142  | 0.74189  | 0.137838 | 194.3027 | 216.8699 | 235.6854 |
| C  | 0.551728 | 1.831206 | -0.8785  | 330.8129 | 351.8219 | 444.2484 |
| H  | -0.32646 | 2.438036 | -0.67747 | 511.0193 | 553.8033 | 736.6955 |
| H  | 0.474389 | 1.417336 | -1.87969 | 975.6541 | 1054.644 | 1170.817 |
| F  | 0.630094 | 1.16066  | 1.411069 | 1258.121 | 1357.808 | 1420.428 |
| F  | 1.646641 | -0.87462 | -1.26114 | 1467.506 | 1478.16  | 1588.887 |
| F  | 1.723732 | -1.23019 | 0.887178 | 3037.036 | 3122.854 | 3158.655 |
| Br | -1.5203  | -0.31016 | -0.03207 |          |          |          |
| H  | 1.44361  | 2.458984 | -0.81228 |          |          |          |

### M3-TSb2

| Cartessian coordinates: |          |          |          | Frequencies (cm-1): |          |          |
|-------------------------|----------|----------|----------|---------------------|----------|----------|
| C                       | 1.317117 | -0.56532 | 0.089959 | -566.415            | 102.0516 | 104.6886 |
| C                       | 0.287746 | 0.282106 | 0.330377 | 111.3393            | 153.7052 | 168.7729 |
| C                       | 0.508952 | 1.906853 | -1.3581  | 295.8089            | 305.8679 | 346.9476 |
| H                       | 0.354849 | 1.321897 | -2.2524  | 441.3714            | 482.8166 | 493.2948 |
| H                       | 1.513082 | 2.236778 | -1.13551 | 526.3868            | 652.477  | 836.8159 |
| F                       | 0.435971 | 1.171572 | 1.322614 | 991.3135            | 1159.03  | 1310.156 |
| F                       | 2.555737 | -0.2879  | 0.449081 | 1416.945            | 1418.104 | 1639.751 |
| F                       | 1.259492 | -1.55247 | -0.77818 | 3095.786            | 3256.319 | 3262.369 |
| Br                      | -1.5001  | -0.28006 | 0.030984 |                     |          |          |
| H                       | -0.30829 | 2.520773 | -1.0116  |                     |          |          |

### M3-TSb3

| Cartessian coordinates: |          |          |          | Frequencies (cm-1): |          |          |
|-------------------------|----------|----------|----------|---------------------|----------|----------|
| C                       | 1.086383 | -0.68899 | -0.22021 | -923.683            | 62.4812  | 100.0562 |
| C                       | 0.155398 | 0.284149 | -0.4652  | 162.1403            | 179.4218 | 284.3604 |
| C                       | 0.574731 | 1.611836 | -0.86574 | 342.1394            | 370.5448 | 393.2973 |
| H                       | 1.094826 | 1.908628 | 0.138158 | 517.3699            | 558.2696 | 644.6191 |
| H                       | -0.23733 | 2.280385 | -1.12493 | 758.6591            | 912.1537 | 1127.508 |
| F                       | 1.658336 | 1.213537 | 1.390342 | 1168.717            | 1254.548 | 1357.452 |
| F                       | 2.316058 | -0.60359 | -0.62699 | 1369.741            | 1471.283 | 1598.931 |
| F                       | 0.83248  | -1.84108 | 0.321156 | 2025.309            | 3084.086 | 3175.468 |
| Br                      | -1.61119 | -0.05615 | 0.061115 |                     |          |          |
| H                       | 1.373151 | 1.614354 | -1.60597 |                     |          |          |

### M4-TSb1

| Cartessian coordinates: |          |          |          | Frequencies (cm-1): |          |          |
|-------------------------|----------|----------|----------|---------------------|----------|----------|
| C                       | -0.08738 | 0.643786 | -0.1161  | -406.403            | 31.3634  | 84.9645  |
| C                       | -1.83767 | -0.60763 | 0.500284 | 126.4804            | 202.8332 | 242.1752 |

|    |          |          |          |          |          |          |
|----|----------|----------|----------|----------|----------|----------|
| C  | -1.34315 | -0.78799 | 1.44493  | 305.3155 | 315.2268 | 486.499  |
| H  | -2.885   | 0.227654 | 0.337768 | 491.0572 | 616.7013 | 657.1289 |
| H  | -3.09681 | 0.965266 | 1.095893 | 1103.361 | 1151.178 | 1171.234 |
| F  | -3.46035 | 0.230067 | -0.57573 | 1285.527 | 1405.252 | 1558.902 |
| F  | -1.63507 | -1.60866 | -0.38367 | 3166.507 | 3183.398 | 3266.415 |
| F  | -0.29494 | 0.985388 | -1.37951 | -406.403 | 31.3634  | 84.9645  |
| Br | -0.11581 | 1.737176 | 0.640328 |          |          |          |
| H  | 1.576372 | -0.3433  | 0.108823 |          |          |          |

#### M4-TSb2

| Cartessian coordinates: |          |          |          | Frequencies (cm-1): |          |          |
|-------------------------|----------|----------|----------|---------------------|----------|----------|
| C                       | 0.294869 | -0.52183 | 0.087698 | -761.889            | 67.8435  | 179.1949 |
| C                       | 1.40259  | 0.507236 | -0.08236 | 260.2809            | 293.4421 | 317.3377 |
| C                       | 1.071022 | 0.659282 | -2.02798 | 323.8608            | 380.0696 | 418.9045 |
| H                       | 1.360405 | 1.802042 | 0.231338 | 458.831             | 558.5238 | 631.9975 |
| H                       | 0.419452 | 2.293606 | 0.408491 | 693.4455            | 712.9023 | 900.8877 |
| F                       | 2.273158 | 2.377872 | 0.243614 | 927.3428            | 945.144  | 1088.328 |
| F                       | 2.586172 | -0.11966 | -0.23142 | 1132.042            | 1282.964 | 1407.999 |
| F                       | 0.417357 | -1.51092 | -0.81004 | 1647.332            | 3181.44  | 3284.641 |
| Br                      | 0.407156 | -1.08737 | 1.310698 |                     |          |          |
| H                       | -1.50877 | 0.240173 | -0.0705  |                     |          |          |

#### M4-TSb3

| Cartessian coordinates: |          |          |          | Frequencies (cm-1): |          |          |
|-------------------------|----------|----------|----------|---------------------|----------|----------|
| C                       | 0.294869 | -0.52183 | 0.087698 | -420.464            | 27.7849  | 82.0719  |
| C                       | 1.40259  | 0.507236 | -0.08236 | 144.2284            | 184.3178 | 262.9368 |
| C                       | 1.071022 | 0.659282 | -2.02798 | 298.4673            | 308.0597 | 440.0211 |
| H                       | 1.360405 | 1.802042 | 0.231338 | 523.8476            | 588.2637 | 721.1259 |
| H                       | 0.419452 | 2.293606 | 0.408491 | 829.9734            | 890.808  | 987.2503 |
| F                       | 2.273158 | 2.377872 | 0.243614 | 1005.907            | 1140.63  | 1199.254 |
| F                       | 2.586172 | -0.11966 | -0.23142 | 1211.982            | 1420.803 | 1636.617 |
| F                       | 0.417357 | -1.51092 | -0.81004 | 2334.055            | 3142.58  | 3235.707 |
| Br                      | 0.407156 | -1.08737 | 1.310698 |                     |          |          |
| H                       | -1.50877 | 0.240173 | -0.0705  |                     |          |          |

#### M4-TSb4

| Cartessian coordinates: |          |          |          | Frequencies (cm-1): |          |          |
|-------------------------|----------|----------|----------|---------------------|----------|----------|
| C                       | -0.24412 | 0.399078 | 0.199738 | -1889.72            | 81.7649  | 161.7776 |
| C                       | -1.42707 | -0.40932 | -0.05341 | 202.5638            | 253.3068 | 277.8622 |
| C                       | -1.29072 | 0.210468 | -1.18305 | 293.701             | 346.8488 | 349.5413 |

|    |          |          |          |          |          |          |
|----|----------|----------|----------|----------|----------|----------|
| H  | -1.42818 | -1.82656 | -0.24676 | 415.3202 | 519.5715 | 579.861  |
| H  | -0.56272 | -2.32642 | -0.64779 | 614.609  | 674.4299 | 903.1308 |
| F  | -2.3755  | -2.33916 | -0.20986 | 993.1499 | 1141.086 | 1231.766 |
| F  | -2.52723 | 0.094792 | 0.600326 | 1287.232 | 1388.318 | 1454.421 |
| F  | -0.41538 | 1.118949 | -1.60289 | 1672.813 | 3182.288 | 3290.667 |
| Br | -0.38859 | 1.504767 | 0.855513 |          |          |          |
| H  | 1.50874  | -0.25688 | 0.113336 |          |          |          |

### Mb1

| Cartessian coordinates: |          |          |          | Frequencies (cm-1): |          |          |
|-------------------------|----------|----------|----------|---------------------|----------|----------|
| C                       | 1.281902 | -0.24657 | -0.01891 | 33.607              | 107.8404 | 158.432  |
| C                       | 0.076265 | 0.620594 | -0.17209 | 175.3019            | 284.0754 | 324.0187 |
| C                       | 0.153793 | 2.092685 | -0.00605 | 417.6513            | 469.5745 | 561.8124 |
| H                       | 0.048314 | 2.383546 | 1.045933 | 571.5063            | 691.1312 | 847.0372 |
| H                       | -0.64381 | 2.585019 | -0.5609  | 1014.173            | 1058.623 | 1094.991 |
| F                       | 1.577073 | -0.49578 | 1.285842 | 1127.829            | 1173.453 | 1317.877 |
| F                       | 2.369141 | 0.360581 | -0.54503 | 1409.885            | 1467.364 | 1477.899 |
| F                       | 1.153827 | -1.43936 | -0.62057 | 2988.859            | 3074.494 | 3118.556 |
| Br                      | -1.58543 | -0.23035 | -0.00065 |                     |          |          |
| H                       | 1.113359 | 2.464471 | -0.36209 |                     |          |          |

### Mb2

| Cartessian coordinates: |          |          |          | Frequencies (cm-1): |          |          |
|-------------------------|----------|----------|----------|---------------------|----------|----------|
| C                       | 1.312663 | -0.22204 | -0.01381 | 65.3349             | 145.5176 | 231.2434 |
| C                       | 0.192703 | 0.684747 | -0.50929 | 242.1728            | 250.266  | 327.1439 |
| C                       | 0.198754 | 2.017512 | 0.031108 | 428.3307            | 477.3781 | 545.6014 |
| H                       | -0.28611 | 2.815247 | -0.50853 | 601.5302            | 634.1351 | 714.0325 |
| H                       | 0.539399 | 2.199686 | 1.038677 | 802.0188            | 1011.644 | 1073.852 |
| F                       | 1.376943 | -0.28231 | 1.325044 | 1123.078            | 1159.198 | 1204.146 |
| F                       | 2.495634 | 0.269125 | -0.45157 | 1257.83             | 1400.74  | 1479.437 |
| F                       | 1.208264 | -1.47176 | -0.48433 | 3150.209            | 3165.416 | 3272.713 |
| Br                      | -1.61009 | -0.20469 | 0.014583 |                     |          |          |
| H                       | 0.147455 | 0.632527 | -1.59086 |                     |          |          |

### Mb3

| Cartessian coordinates: |          |          |          | Frequencies (cm-1): |          |          |
|-------------------------|----------|----------|----------|---------------------|----------|----------|
| C                       | 1.296807 | -0.4823  | -0.37523 | 59.3913             | 157.0371 | 206.7985 |
| C                       | 0.307768 | 0.515493 | 0.161269 | 251.8442            | 279.6207 | 302.5013 |
| C                       | 0.427633 | 1.880075 | -0.47088 | 305.6961            | 384.4436 | 533.5442 |
| H                       | -0.33328 | 2.535537 | -0.05524 | 579.6786            | 724.2037 | 795.7824 |

|    |          |          |          |          |          |          |
|----|----------|----------|----------|----------|----------|----------|
| H  | 0.297223 | 1.816398 | -1.54846 | 886.4754 | 1100.56  | 1117.849 |
| F  | 0.473562 | 0.63056  | 1.531383 | 1139.209 | 1228.208 | 1331.737 |
| F  | 2.545406 | -0.02679 | -0.49938 | 1418.044 | 1482.344 | 1486.274 |
| F  | 1.296424 | -1.68219 | 0.181487 | 3055.339 | 3128.156 | 3146.126 |
| Br | -1.49742 | -0.24041 | -0.14164 |          |          |          |
| H  | 1.413889 | 2.288665 | -0.25141 |          |          |          |

#### Mb4

| Cartessian coordinates: |          |          |          | Frequencies (cm-1): |          |          |
|-------------------------|----------|----------|----------|---------------------|----------|----------|
| C                       | -0.24412 | 0.399078 | 0.199738 | 81.2379             | 98.7406  | 153.3499 |
| C                       | -1.42707 | -0.40932 | -0.05341 | 245.6975            | 287.3567 | 295.5331 |
| C                       | -1.29072 | 0.210468 | -1.18305 | 314.6165            | 385.0759 | 491.1177 |
| H                       | -1.42818 | -1.82656 | -0.24676 | 583.6767            | 623.833  | 739.9295 |
| H                       | -0.56272 | -2.32642 | -0.64779 | 885.6755            | 946.7185 | 1016.866 |
| F                       | -2.3755  | -2.33916 | -0.20986 | 1121.519            | 1160.48  | 1215.828 |
| F                       | -2.52723 | 0.094792 | 0.600326 | 1329.054            | 1379.324 | 1466.184 |
| F                       | -0.41538 | 1.118949 | -1.60289 | 3098.16             | 3165.803 | 3278.249 |
| Br                      | -0.38859 | 1.504767 | 0.855513 |                     |          |          |
| H                       | 1.50874  | -0.25688 | 0.113336 |                     |          |          |

#### CF<sub>3</sub>CBr=CH<sub>2</sub>(2-BTP)

| Cartessian coordinates: |          |          |          | Frequencies (cm-1): |          |          |
|-------------------------|----------|----------|----------|---------------------|----------|----------|
| C                       | 1.288871 | -0.20737 | 0.000035 | 52.5298             | 166.1386 | 225.2337 |
| C                       | 0.090994 | 0.712111 | -5.9E-05 | 326.333             | 336.7488 | 480.3144 |
| C                       | 0.188872 | 2.029236 | -0.00016 | 480.4412            | 578.3881 | 617.8373 |
| H                       | 1.161187 | 2.499975 | -0.0002  | 690.0438            | 731.4281 | 825.6787 |
| H                       | -0.68638 | 2.660314 | -0.00021 | 970.8079            | 1091.321 | 1143.19  |
| F                       | 1.304725 | -1.00422 | 1.08397  | 1159.817            | 1268.217 | 1431.334 |
| F                       | 2.439764 | 0.492225 | -6.7E-05 | 1691.658            | 3165.323 | 3255.501 |
| F                       | 1.304689 | -1.00447 | -1.08375 |                     |          |          |
| Br                      | -1.58085 | -0.19188 | 0.000003 |                     |          |          |
| H                       | 1.288871 | -0.20737 | 0.000035 |                     |          |          |

#### Br

| Cartessian coordinates: |   |   |   | Frequencies (cm-1): |  |  |
|-------------------------|---|---|---|---------------------|--|--|
| Br                      | 0 | 0 | 0 |                     |  |  |

#### CF<sub>2</sub>=CFBr

| Cartessian coordinates: |         |          |        | Frequencies (cm-1): |          |          |
|-------------------------|---------|----------|--------|---------------------|----------|----------|
| C                       | -1.4004 | -0.25642 | -1E-06 | 155.8326            | 160.4704 | 314.1286 |

|    |          |          |          |          |          |          |
|----|----------|----------|----------|----------|----------|----------|
| C  | -0.3132  | 0.500281 | -1E-06   | 361.546  | 363.9925 | 510.6695 |
| C  | -0.4238  | 1.830022 | 0        | 575.0139 | 669.2827 | 1025.455 |
| H  | -2.625   | 0.232355 | 0.000001 | 1190.422 | 1311.615 | 1818.024 |
| H  | -1.3913  | -1.57226 | 0        |          |          |          |
| F  | 1.435501 | -0.16783 | 0        |          |          |          |
| F  | -1.4004  | -0.25642 | -1E-06   |          |          |          |
| F  | -0.3132  | 0.500281 | -1E-06   |          |          |          |
| Br | -0.4238  | 1.830022 | 0        |          |          |          |
| H  | -2.625   | 0.232355 | 0.000001 |          |          |          |

---

### CF<sub>2</sub>Br

| Cartessian coordinates: |          |          |          | Frequencies (cm-1): |          |          |
|-------------------------|----------|----------|----------|---------------------|----------|----------|
| C                       | -0.36179 | -0.91727 | 0        | 304.0657            | 320.0833 | 577.2351 |
| F                       | 0.040957 | -1.55795 | 1.082635 | 664.9574            | 1141.694 | 1193.649 |
| F                       | 0.040957 | -1.55795 | -1.08264 |                     |          |          |
| Br                      | 0.040957 | 0.958479 | 0        |                     |          |          |

---

### CF<sub>2</sub>BrCCH<sub>2</sub>

| Cartessian coordinates: |          |          |          | Frequencies (cm-1): |          |          |
|-------------------------|----------|----------|----------|---------------------|----------|----------|
| C                       | -0.61293 | 0.586137 | 0.00005  | 115.899             | 149.9784 | 284.6481 |
| C                       | -1.69916 | -0.37555 | 0.000544 | 291.1211            | 366.6364 | 380.8994 |
| C                       | -1.97094 | -1.64505 | 0.000095 | 487.9781            | 618.2948 | 641.6007 |
| H                       | -2.99325 | -2.00592 | 0.00058  | 827.44              | 946.1145 | 982.5793 |
| H                       | -1.18112 | -2.39445 | -0.00057 | 1108.134            | 1166.767 | 1411.956 |
| F                       | -0.63991 | 1.382124 | -1.08601 | 1785.152            | 3075.333 | 3167.935 |
| F                       | -0.63925 | 1.382781 | 1.085619 |                     |          |          |
| Br                      | 1.182426 | -0.33934 | -1.8E-05 |                     |          |          |

---

### CF<sub>2</sub>BrCFCH<sub>2</sub>

| Cartessian coordinates: |          |          |          | Frequencies (cm-1): |          |          |
|-------------------------|----------|----------|----------|---------------------|----------|----------|
| C                       | 0.320991 | -0.50893 | -3.9E-05 | 53.5527             | 184.7316 | 242.5584 |
| C                       | 1.410074 | 0.537735 | 0.000228 | 302.0317            | 315.9306 | 325.3955 |
| C                       | 1.316143 | 1.851083 | 0.000102 | 394.3916            | 553.8073 | 669.0636 |
| H                       | 0.356032 | 2.336751 | 0.000392 | 698.8591            | 746.1112 | 933.8817 |
| H                       | 2.213661 | 2.451255 | -0.00029 | 934.3514            | 950.5991 | 1097.578 |
| F                       | 2.610006 | -0.07703 | 0.000071 | 1110.529            | 1290.694 | 1415.908 |
| F                       | 0.450704 | -1.30205 | -1.08373 | 1742.014            | 3182.016 | 3283.723 |

|    |          |          |          |
|----|----------|----------|----------|
| F  | 0.449796 | -1.30211 | 1.083805 |
| Br | -1.4985  | 0.230383 | -0.00009 |

### CF<sub>2</sub>CFCH<sub>3</sub>

| Cartessian coordinates: |          |          |          | Frequencies (cm-1): |          |          |
|-------------------------|----------|----------|----------|---------------------|----------|----------|
| C                       | 0.678699 | 0.073007 | 0.00006  | 174.9983            | 185.7044 | 218.5461 |
| C                       | -0.63325 | -0.10236 | -2.9E-05 | 354.759             | 372.4995 | 507.154  |
| C                       | -1.68318 | 0.943232 | 0.000153 | 553.8718            | 585.502  | 752.3413 |
| H                       | -2.31773 | 0.844623 | -0.88273 | 980.4878            | 1068.863 | 1167.436 |
| H                       | -1.23715 | 1.934808 | 0.000149 | 1253.524            | 1294.226 | 1425.901 |
| F                       | -1.08871 | -1.37859 | -0.00016 | 1474.024            | 1488.181 | 1847.345 |
| F                       | 1.260827 | 1.265966 | -0.00017 | 3031.143            | 3078.801 | 3132.943 |
| F                       | 1.572213 | -0.8993  | 0.000164 |                     |          |          |
| H                       | -2.31771 | 0.844601 | 0.882961 |                     |          |          |

### CF<sub>2</sub>HCBBrCH<sub>2</sub>

| Cartessian coordinates: |          |          |          | Frequencies (cm-1): |          |          |
|-------------------------|----------|----------|----------|---------------------|----------|----------|
| C                       | -1.35942 | -0.40275 | 0.327675 | 62.2961             | 178.1892 | 282.7359 |
| C                       | -0.28508 | 0.590537 | -0.0232  | 324.4077            | 364.5209 | 519.7342 |
| C                       | -0.49982 | 1.85397  | -0.34075 | 586.9459            | 691.5292 | 752.3134 |
| H                       | -1.51135 | 2.23394  | -0.36448 | 952.1142            | 964.5777 | 1060.621 |
| H                       | 0.308487 | 2.527856 | -0.57944 | 1081.477            | 1167.923 | 1363.29  |
| F                       | -1.4307  | -1.38457 | -0.62183 | 1390.71             | 1428.359 | 1695.392 |
| F                       | -2.57977 | 0.209207 | 0.363727 | 3079.058            | 3161.195 | 3251.737 |
| F                       | 1.467282 | -0.15857 | 0.062644 |                     |          |          |
| Br                      | -1.1919  | -0.88422 | 1.291958 |                     |          |          |
| H                       | -1.35942 | -0.40275 | 0.327675 |                     |          |          |

### CF<sub>3</sub>

| Cartessian coordinates: |          |          |   | Frequencies (cm-1): |          |          |
|-------------------------|----------|----------|---|---------------------|----------|----------|
| C                       | 0        | 0        | 0 | -1138.21            | 464.3664 | 464.3718 |
| F                       | 0        | 1.315785 | 0 | 883.6017            | 1411.163 | 1411.185 |
| F                       | -1.1395  | -0.65789 | 0 |                     |          |          |
| F                       | 1.139503 | -0.65789 | 0 |                     |          |          |

### CF<sub>3</sub>CBrCH

| Cartessian coordinates: |          |          |          | Frequencies (cm-1): |          |          |
|-------------------------|----------|----------|----------|---------------------|----------|----------|
| C                       | -1.32493 | -0.15453 | -2.6E-05 | 49.6551             | 153.8375 | 219.225  |
| C                       | -0.11508 | 0.752558 | -0.00015 | 289.5565            | 296.7943 | 466.4046 |
| C                       | -0.15298 | 2.041263 | -0.00033 | 475.5963            | 573.4199 | 627.477  |

|    |          |          |          |          |          |          |
|----|----------|----------|----------|----------|----------|----------|
| H  | 0.455624 | 2.924716 | -0.00073 | 655.7091 | 714.8985 | 727.8069 |
| F  | -1.34325 | -0.94932 | -1.08353 | 859.1136 | 1144.42  | 1166.672 |
| F  | -2.45898 | 0.562627 | -0.00018 | 1230.296 | 1697.829 | 3309.808 |
| F  | -1.34338 | -0.94911 | 1.083476 |          |          |          |
| Br | 1.583221 | -0.19252 | 0.000167 |          |          |          |

---

### CH<sub>3</sub>CCH<sub>2</sub>

| Cartessian coordinates: |          |          |          | Frequencies (cm-1): |          |          |
|-------------------------|----------|----------|----------|---------------------|----------|----------|
| C                       | 0.371451 | -0.04135 | 0.00001  | 95.3878             | 192.6705 | 322.8984 |
| C                       | -1.01134 | -0.55388 | 0.000054 | 416.2248            | 480.5134 | 545.3308 |
| C                       | -2.21503 | -0.06272 | -2.5E-05 | 591.9791            | 638.8924 | 796.9205 |
| H                       | -3.09446 | -0.69612 | 0.000134 | 942.4897            | 997.8817 | 1104.513 |
| H                       | -2.38292 | 1.013779 | -7.5E-05 | 1133.182            | 1206.942 | 1412.228 |
| F                       | 0.405267 | 1.314097 | -0.00015 | 1763.048            | 3070.057 | 3169.6   |
| F                       | 1.053309 | -0.4555  | -1.08514 |                     |          |          |
| F                       | 1.0533   | -0.45526 | 1.085248 |                     |          |          |

---

### CF<sub>2</sub>CBrCH<sub>2</sub>

| Cartessian coordinates: |          |          |   | Frequencies (cm-1): |          |          |
|-------------------------|----------|----------|---|---------------------|----------|----------|
| C                       | 1.382331 | -0.27061 | 0 | 113.6777            | 178.014  | 263.3912 |
| C                       | 0.330721 | 0.611404 | 0 | 311.0458            | 360.7913 | 459.6009 |
| C                       | 0.464451 | 1.981896 | 0 | 491.9971            | 522.4834 | 642.7621 |
| H                       | -0.40106 | 2.622399 | 0 | 735.3385            | 855.5404 | 1109.826 |
| F                       | 2.642271 | 0.129366 | 0 | 1268.592            | 1307.509 | 1480.454 |
| F                       | 1.29301  | -1.58162 | 0 | 1535.11             | 3169.012 | 3273.584 |
| Br                      | -1.41511 | -0.16906 | 0 |                     |          |          |
| H                       | 1.447376 | 2.428871 | 0 |                     |          |          |

---

### CF<sub>3</sub>CHCH<sub>2</sub>

| Cartessian coordinates: |          |          |          | Frequencies (cm-1): |          |          |
|-------------------------|----------|----------|----------|---------------------|----------|----------|
| C                       | 0.370139 | -0.01808 | 0.000039 | 94.7005             | 269.7114 | 318.5222 |
| C                       | -0.98785 | -0.64286 | 0.000062 | 427.988             | 511.4572 | 541.9365 |
| C                       | -2.11377 | 0.05037  | 0.000006 | 630.46              | 719.4781 | 807.5328 |
| H                       | -3.0712  | -0.45064 | 0.000032 | 1006.342            | 1020.242 | 1025.848 |
| H                       | -2.11599 | 1.131087 | -0.00011 | 1116.12             | 1158.782 | 1279.851 |
| F                       | 0.338492 | 1.327066 | -0.00053 | 1327.556            | 1461.076 | 1721.309 |
| F                       | 1.083484 | -0.40244 | -1.08434 | 3156.043            | 3185.543 | 3242.26  |
| F                       | 1.08324  | -0.40156 | 1.084782 |                     |          |          |
| H                       | -0.97087 | -1.72465 | 0.00014  |                     |          |          |

---

**CFBrCFCH<sub>2</sub>**

| Cartessian coordinates: |          |          |   | Frequencies (cm-1): |          |          |
|-------------------------|----------|----------|---|---------------------|----------|----------|
| C                       | 0.313224 | 0.469279 | 0 | 105.0218            | 187.2161 | 219.8365 |
| C                       | 1.457567 | -0.32649 | 0 | 326.4989            | 354.9356 | 442.9456 |
| C                       | 1.544668 | -1.68503 | 0 | 510.9269            | 607.203  | 671.2127 |
| H                       | 0.657897 | -2.29518 | 0 | 764.9695            | 935.0022 | 1021.979 |
| H                       | 2.51524  | -2.15425 | 0 | 1197.151            | 1347.749 | 1410.635 |
| F                       | 2.607562 | 0.388427 | 0 | 1511.47             | 3185.802 | 3287.209 |
| F                       | 0.426032 | 1.792662 | 0 |                     |          |          |
| Br                      | -1.43909 | -0.16934 | 0 |                     |          |          |

**CH<sub>3</sub>**

| Cartessian coordinates: |          |          |   | Frequencies (cm-1): |          |          |
|-------------------------|----------|----------|---|---------------------|----------|----------|
| C                       | 0        | 0        | 0 | 542.0577            | 1407.588 | 1407.588 |
| H                       | 0        | 1.078065 | 0 | 3108.737            | 3283.534 | 3283.534 |
| H                       | -0.93363 | -0.53903 | 0 |                     |          |          |
| H                       | 0.933632 | -0.53903 | 0 |                     |          |          |

**CHBr=CH<sub>2</sub>**

| Cartessian coordinates: |          |          |        | Frequencies (cm-1): |          |          |
|-------------------------|----------|----------|--------|---------------------|----------|----------|
| C                       | -1.08924 | 0.522562 | 0      | 345.905             | 600.012  | 601.6452 |
| C                       | -2.11157 | -0.3114  | 0      | 941.4288            | 976.5493 | 1021.046 |
| H                       | -3.11899 | 0.084314 | -1E-06 | 1282.387            | 1408.424 | 1656.76  |
| H                       | -1.98991 | -1.38475 | 0      | 3143.637            | 3211.103 | 3234.42  |
| Br                      | 0.728362 | -0.04469 | 0      |                     |          |          |
| H                       | -1.17889 | 1.597586 | 0      |                     |          |          |

**CFH=CH<sub>2</sub>**

| Cartessian coordinates: |          |          |          | Frequencies (cm-1): |          |          |
|-------------------------|----------|----------|----------|---------------------|----------|----------|
| C                       | -0.02217 | 0.434116 | -5E-06   | 487.5799            | 729.3017 | 901.1633 |
| H                       | 0.11849  | 1.506069 | 0.000005 | 936.2071            | 967.2145 | 1163.256 |
| C                       | -1.17729 | -0.19918 | 0        | 1334.18             | 1415.353 | 1705.863 |
| H                       | -2.09211 | 0.37291  | 0.000011 | 3165.179            | 3201.064 | 3258.105 |
| H                       | -1.23437 | -1.27772 | -2E-06   |                     |          |          |
| F                       | 1.156081 | -0.22343 | 0.000002 |                     |          |          |

**F**

| Cartessian coordinates: |   |   |   | Frequencies (cm-1): |  |  |
|-------------------------|---|---|---|---------------------|--|--|
| F                       | 0 | 0 | 0 |                     |  |  |



---

**H**

| Cartessian coordinates: |   |   |   | Frequencies (cm-1): |
|-------------------------|---|---|---|---------------------|
| H                       | 0 | 0 | 0 |                     |

---

**H<sub>2</sub>**

| Cartessian coordinates: |   |   |          | Frequencies (cm-1): |
|-------------------------|---|---|----------|---------------------|
| H                       | 0 | 0 | 0.371458 |                     |
| H                       | 0 | 0 | -0.37146 |                     |

---

**HBr**

| Cartessian coordinates: |   |   |          | Frequencies (cm-1): |
|-------------------------|---|---|----------|---------------------|
| Br                      | 0 | 0 | 0.039555 | 2624.583            |
| H                       | 0 | 0 | -1.38441 |                     |

---

**HF**

| Cartessian coordinates: |   |   |          | Frequencies (cm-1): |
|-------------------------|---|---|----------|---------------------|
| F                       | 0 | 0 | 0.092399 | 4071.909            |
| H                       | 0 | 0 | -0.83159 |                     |

---
