# Supplementary material for: Theoretical Kinetic and Mechanistic Studies on the Reactions of CF3CBrCH2 (2-BTP) with OH and H Radicals
Source: MDPI journal article supplement (doi:10.3390/molecules22122140), 2017-12-06
Supplement: s1 [file s1]

## *Supplemental Material-I*

### **Theoretical Kinetic and Mechanism Studies on the Reactions of CF<sub>3</sub>CBrCH<sub>2</sub> (2-BTP) with OH and H Radicals**

Huiting Bian<sup>1</sup>, Lili Ye<sup>2</sup>, Jinhua Sun<sup>1,\*</sup>

<sup>1</sup> *State Key Laboratory of Fire Science, University of Science and Technology of China, Hefei, Anhui 230026, P. R. China*

<sup>2</sup> *Key Laboratory for Power Machinery and Engineering of MOE, Shanghai Jiao Tong University, Shanghai 200240, P. R. China*

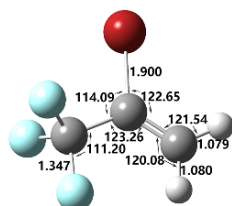

CF<sub>3</sub>CBr=CH<sub>2</sub>

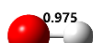

OH

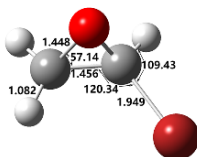

c-CH<sub>2</sub>CBrO

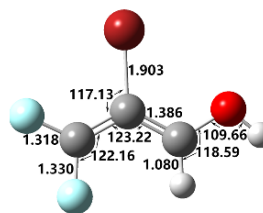

CF<sub>2</sub>CBrCHO

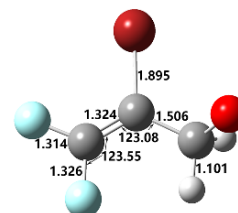

CF<sub>2</sub>CBrCH<sub>2</sub>O

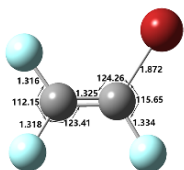

CF<sub>2</sub>=CFBr

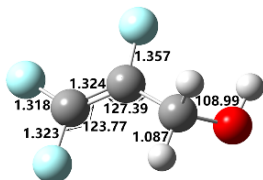

CF<sub>2</sub>CFCH<sub>2</sub>OH

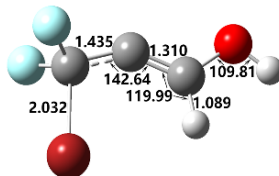

CF<sub>2</sub>BrCCHOH

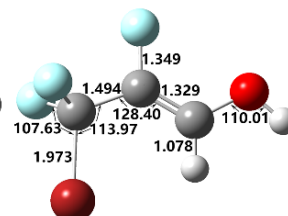

CF<sub>2</sub>BrCFCHOH

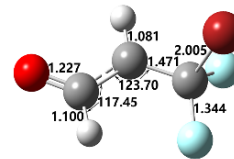

CF<sub>2</sub>BrCHCHO

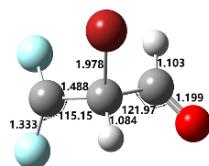

CF<sub>2</sub>CHBrCHO

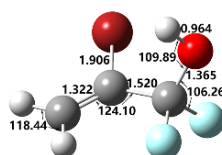

CF<sub>2</sub>OHCBrCH<sub>2</sub>

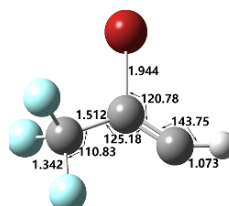

CF<sub>3</sub>CBrCH

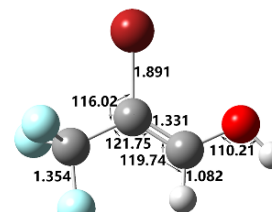

CF<sub>3</sub>CBrCHOH

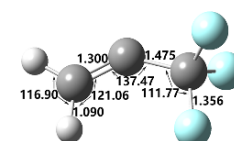

CF<sub>3</sub>CCH<sub>2</sub>

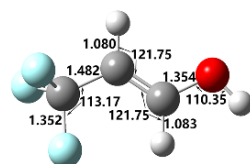

CF<sub>3</sub>CHCHOH

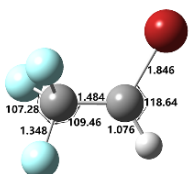

CF<sub>3</sub>CHBr

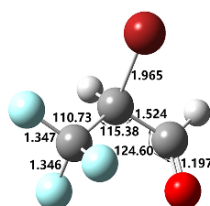

CF<sub>3</sub>CHBrCHO

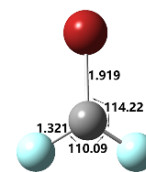

CF<sub>2</sub>Br

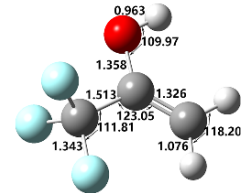

CF<sub>3</sub>COHCH<sub>2</sub>

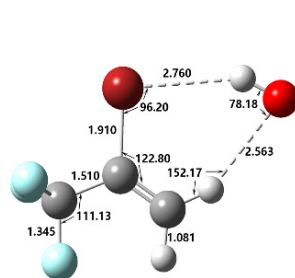

CRa4

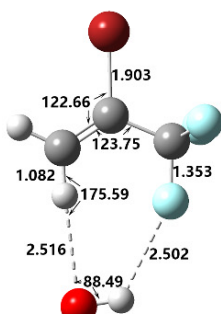

CRa5

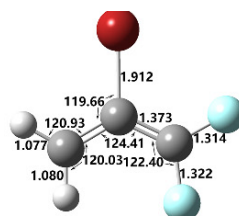

CF<sub>2</sub>=CBr=CH<sub>2</sub>

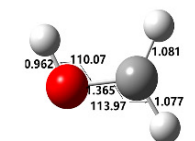

CH<sub>2</sub>OH

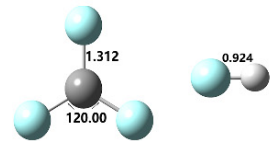

CF<sub>3</sub>

HF

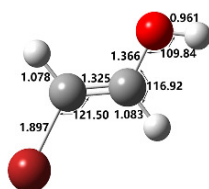

CHBr=CHOH

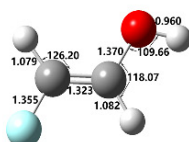

CHF=CHOH

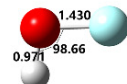

FOH

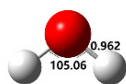

H<sub>2</sub>O

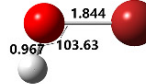

BrOH

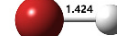

HBr

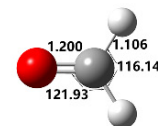

CH<sub>2</sub>O

**Figure S1.** Optimized geometries of reactants, products and prereaction complexes involved in the reactions of 2-BTP + OH calculated at B3LYP/aug-cc-pVTZ. Distances and angles are in angstrom and degree, respectively.

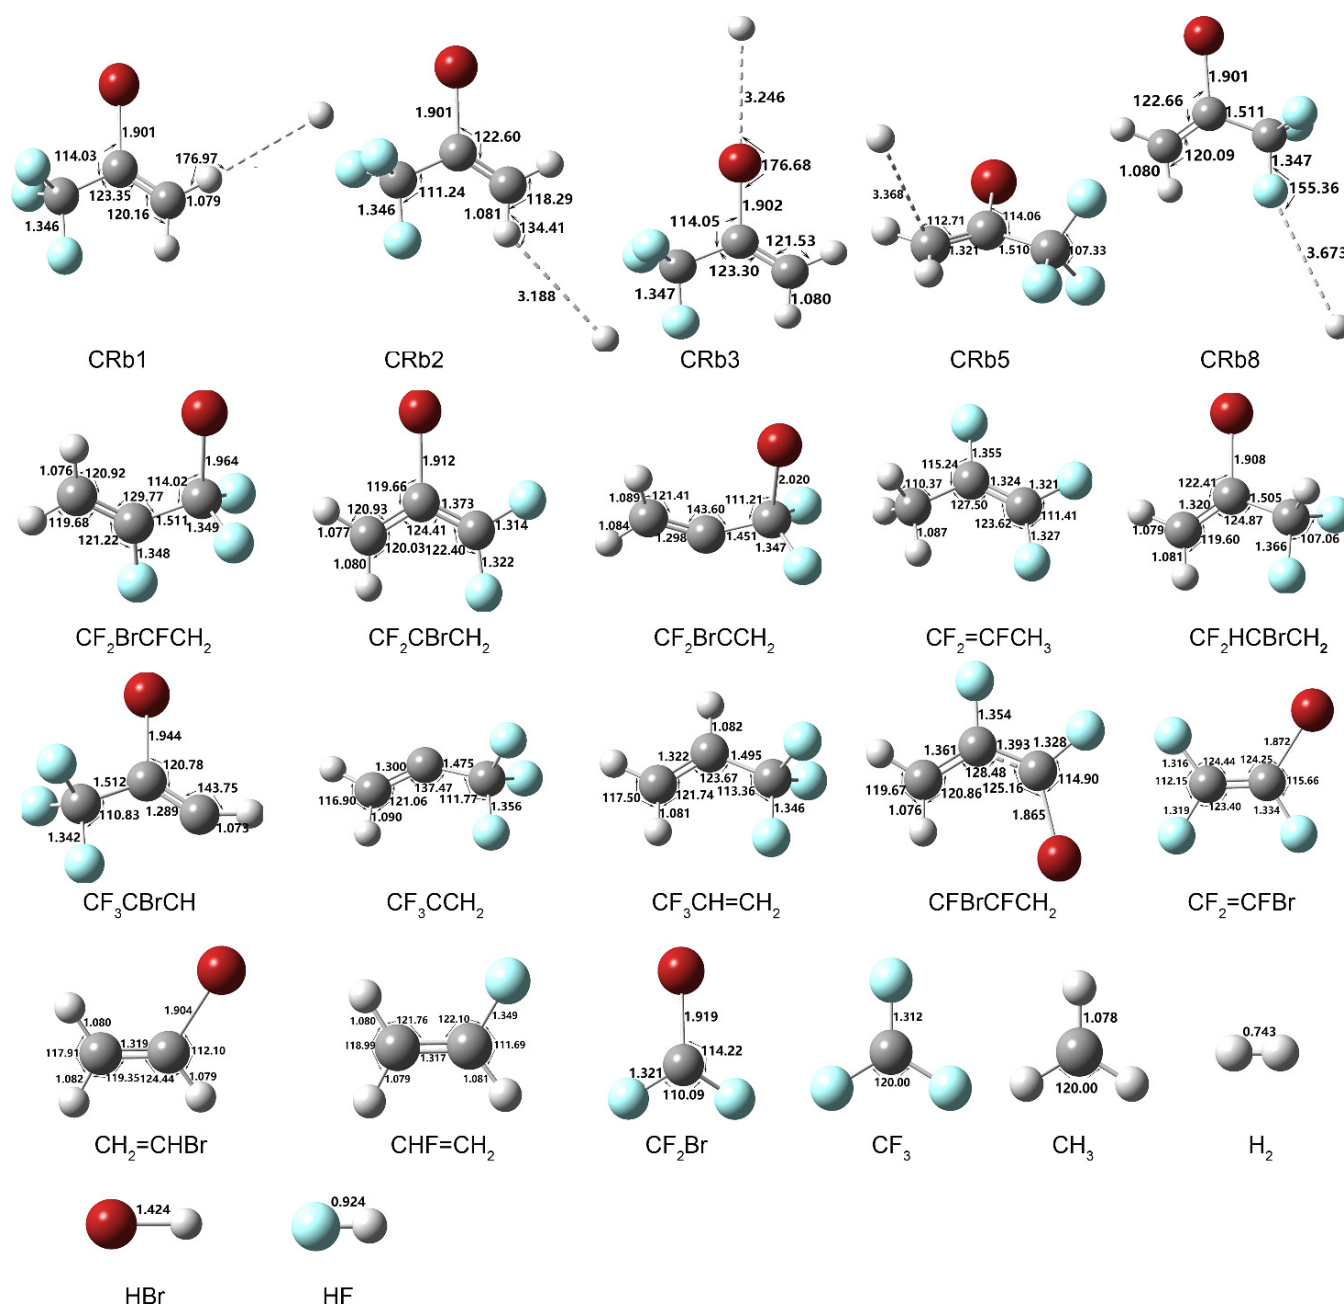

**Figure S2.** Optimized geometries of reactants, products and prereaction complexes involved in the reactions of 2-BTP + H calculated at B3LYP/aug-cc-pVTZ. Distances and angles are in angstrom and degree, respectively.

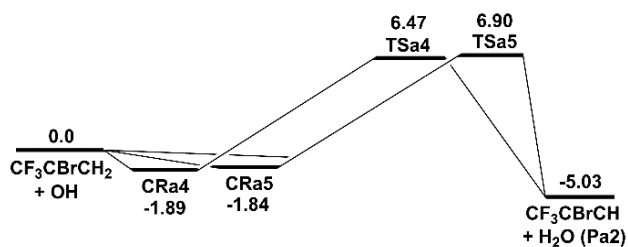

**Figure S3.** Complete potential energy diagram for channels including prereaction complexes in the reactions of 2-BTP with OH radical at 0 K in kcal/mol at CCSD(T)/aug-cc-pVTZ//B3LYP/aug-cc-pVTZ (zero point vibrational energy included).

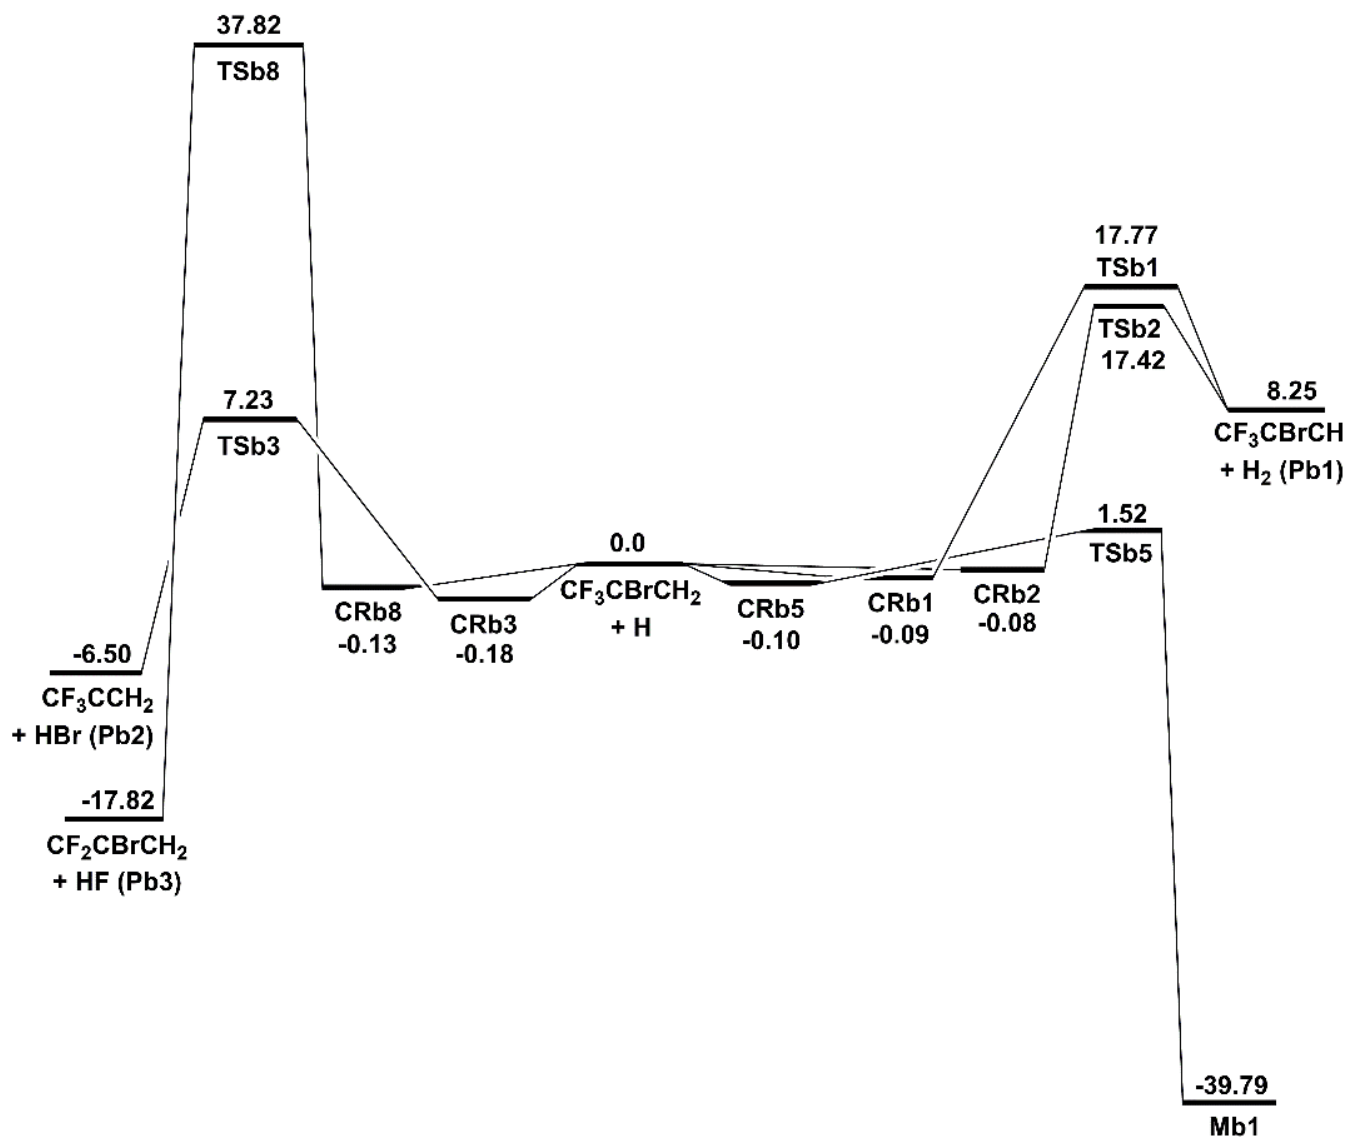

**Figure S4.** Complete potential energy diagram for channels including prereaction complexes in the reactions of 2-BTP with H radical at 0 K in kcal/mol at CCSD(T)/aug-cc-pVTZ//B3LYP/aug-cc-pVTZ (zero point vibrational energy included).

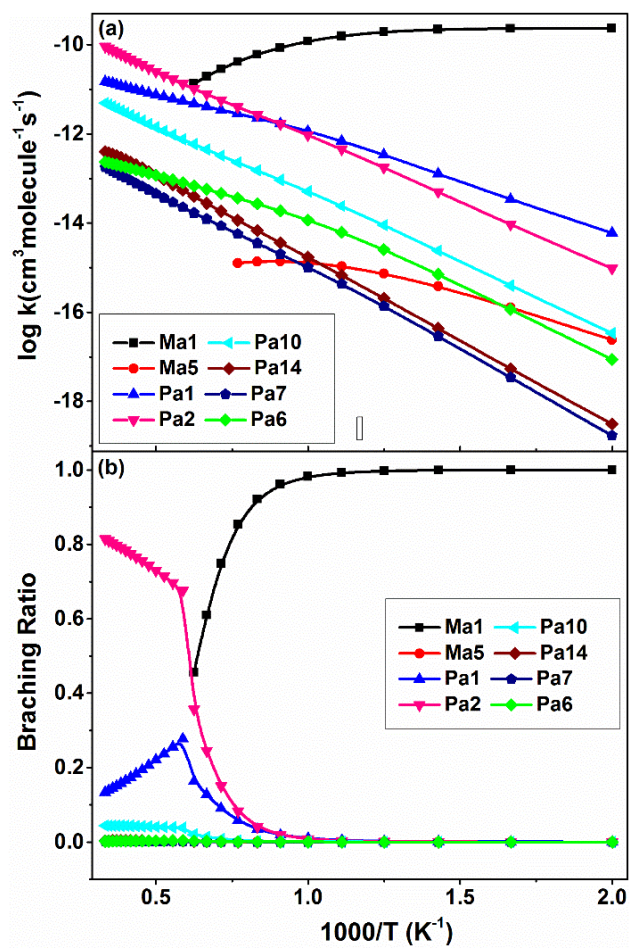

**Figure S5.** Temperature-dependent rate constants (a) and branching ratios of the major channels for 2-BTP + OH at 100 atm in N<sub>2</sub>.

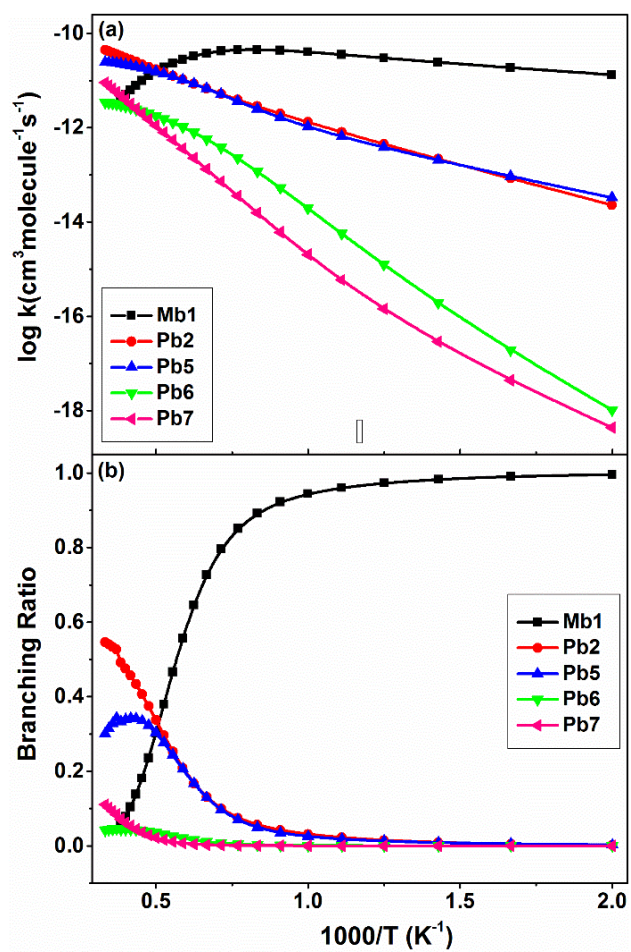

**Figure S6.** Temperature-dependent rate constants (a) and branching ratios (b) of the major channels for 2-BTP + H at 100 atm in N<sub>2</sub>.

**Table S1.** Relative energies of all the stationary points involved in 2-BTP + OH reaction at 0 K in kcal/mol by using the CCSD(T)/aug-cc-pVTZ//B3LYP/aug-cc-pVTZ method.

| Species                                                   | $\Delta E$ | $\Delta E + \Delta E_{\text{ZPVE}}$ | Species | $\Delta E$ | $\Delta E + \Delta E_{\text{ZPVE}}$ |
|-----------------------------------------------------------|------------|-------------------------------------|---------|------------|-------------------------------------|
| Ra: CF <sub>3</sub> CB $\text{r}$ =CH <sub>2</sub> + OH   | 0.0        | 0.0                                 | TSa3    | 35.91      | 6.47                                |
| Pa1: CF <sub>3</sub> COHCH <sub>2</sub> + Br              | -27.28     | -23.59                              | TSa4    | 8.97       | 6.47                                |
| Pa2: CF <sub>3</sub> CB $\text{r}$ CH + H <sub>2</sub> O  | -4.45      | -5.03                               | TSa5    | 9.37       | 6.90                                |
| Pa3: CF <sub>3</sub> CCH <sub>2</sub> + BrOH              | 31.74      | 31.87                               | TSa6    | 73.99      | 75.17                               |
| Pa4: CF <sub>2</sub> OHCB $\text{r}$ CH <sub>2</sub> + F  | 15.28      | 17.38                               | TSa7    | 74.35      | 75.59                               |
| Pa5: CF <sub>2</sub> CB $\text{r}$ CH <sub>2</sub> + FOH  | 70.51      | 70.24                               | TSa8    | 75.82      | 75.60                               |
| Pa6: CF <sub>3</sub> CHBr + CH <sub>2</sub> O             | -11.51     | -11.88                              | Ma1-TS1 | 8.56       | 7.35                                |
| Pa7: CF <sub>3</sub> CHBrCHO + H                          | -0.12      | -2.73                               | Ma1-TS2 | 13.10      | 14.06                               |
| Pa8: cCH <sub>2</sub> CHBrO + CF <sub>3</sub>             | 12.91      | 14.56                               | Ma1-TS3 | 14.21      | 17.62                               |
| Pa9: CF <sub>2</sub> CB $\text{r}$ CH <sub>2</sub> O + HF | 7.51       | 7.11                                | Ma1-TS4 | 31.73      | 32.22                               |
| Pa10: CF <sub>3</sub> CB $\text{r}$ CHOH + H              | 5.45       | 3.35                                | Ma1-TS5 | 5.34       | 6.65                                |
| Pa11: CF <sub>2</sub> CB $\text{r}$ CHOH + HF             | -11.37     | -9.90                               | Ma1-TS6 | 18.32      | 17.87                               |
| Pa12: CF <sub>2</sub> CFCH <sub>2</sub> OH + Br           | -1.26      | 2.82                                | Ma2-TS1 | -2.46      | -1.07                               |
| Pa13: CF <sub>2</sub> =CFBr + CH <sub>2</sub> OH          | 22.06      | 22.52                               | Ma2-TS2 | 2.49       | 4.57                                |
| Pa14: CF <sub>3</sub> CHCHOH + Br                         | -28.98     | -24.99                              | Ma2-TS3 | 10.00      | 13.74                               |
| Pa15: CF <sub>2</sub> CHBrCHO + HF                        | -13.61     | -13.48                              | Ma2-TS4 | 25.46      | 28.46                               |
| Pa16: CHBr=CHOH + CF <sub>3</sub>                         | 1.15       | 2.24                                | Ma3-TS1 | -6.16      | -2.37                               |
| Pa17: CF <sub>2</sub> BrCH=CHO + HF                       | -21.82     | -22.20                              | Ma3-TS2 | 25.89      | 27.30                               |
| Pa18: CF <sub>2</sub> BrCCHOH + HF                        | 5.52       | 5.41                                | Ma4-TS1 | 3.54       | 6.34                                |
| Pa19: CHF=CHOH + CF <sub>2</sub> Br                       | 13.45      | 14.38                               | Ma4-TS2 | 13.84      | 15.64                               |
| Pa20: CF <sub>2</sub> BrCFCHOH + H                        | 23.75      | 21.21                               | Ma4-TS3 | 27.08      | 25.53                               |
| Ma1                                                       | -31.91     | -28.01                              | Ma4-TS4 | 26.04      | 26.23                               |
| Ma2                                                       | -38.55     | -34.20                              | Ma5-TS1 | 4.40       | 2.59                                |
| Ma3                                                       | -16.88     | -12.72                              | Ma5-TS2 | -6.06      | -4.24                               |
| Ma4                                                       | -23.41     | -19.89                              | Ma5-TS3 | 41.71      | 44.51                               |
| Ma5                                                       | -26.33     | -22.95                              | CRa4    | -2.73      | -1.89                               |
| TSa1                                                      | -0.05      | 1.52                                | CRa5    | -2.68      | -1.84                               |
| TSa2                                                      | 0.27       | 1.80                                |         |            |                                     |

**Table S2.** Relative energies of all the stationary points involved in 2-BTP + H at 0 K in kcal/mol by using the CCSD(T)/aug-cc-pVTZ//B3LYP/aug-cc-pVTZ method.

| Species                                               | $\Delta E$ | $\Delta E + \Delta E_{\text{ZPVE}}$ | Species | $\Delta E$ | $\Delta E + \Delta E_{\text{ZPVE}}$ |
|-------------------------------------------------------|------------|-------------------------------------|---------|------------|-------------------------------------|
| Rb: $\text{CF}_3\text{CBr}=\text{CH}_2 + \text{H}$    | 0.0        | 0.0                                 | TSb6    | 68.16      | 70.49                               |
| Pb1: $\text{CF}_3\text{CBrCH} + \text{H}_2$           | 10.56      | 8.25                                | TSb7    | 35.95      | 36.23                               |
| Pb2: $\text{CF}_3\text{CCH}_2 + \text{HBr}$           | -7.67      | -6.50                               | TSb8    | 37.47      | 37.82                               |
| Pb3: $\text{CF}_2\text{CBrCH}_2 + \text{HF}$          | -19.91     | -17.82                              | Mb1-TS1 | 0.95       | 3.99                                |
| Pb4: $\text{CF}_2\text{HCBBrCH}_2 + \text{F}$         | 17.98      | 23.23                               | Mb1-TS2 | 2.55       | 7.97                                |
| Pb5: $\text{CF}_3\text{CHCH}_2 + \text{Br}$           | -34.00     | -27.81                              | Mb1-TS3 | 21.92      | 25.11                               |
| Pb6: $\text{CF}_2\text{CFCH}_3 + \text{Br}$           | -13.99     | -7.90                               | Mb2-TS1 | -37.38     | -31.42                              |
| Pb7: $\text{CHBr}=\text{CH}_2 + \text{CF}_3$          | -6.86      | -3.47                               | Mb2-TS2 | -3.91      | 0.36                                |
| Pb8: $\text{CF}_2=\text{CFBr} + \text{CH}_3$          | 15.39      | 16.54                               | Mb2-TS3 | 23.80      | 28.61                               |
| Pb9: $\text{CFBrCFCH}_2 + \text{HF}$                  | -17.10     | -15.00                              | Mb3-TS1 | -21.76     | -15.76                              |
| Pb10: $\text{CF}_2\text{BrCCH}_2 + \text{HF}$         | -2.59      | -0.89                               | Mb3-TS2 | 21.03      | 23.72                               |
| Pb11: $\text{CHF}=\text{CH}_2 + \text{CF}_2\text{Br}$ | 1.39       | 5.36                                | Mb4-TS1 | 4.05       | 8.14                                |
| Pb12: $\text{CF}_2\text{BrCFCH}_2 + \text{H}$         | 14.46      | 14.09                               | Mb4-TS2 | 19.26      | 19.84                               |
| Mb1                                                   | -45.91     | -39.79                              | Mb4-TS3 | 21.00      | 23.76                               |
| Mb2                                                   | -42.44     | -36.61                              | Mb4-TS4 | 46.70      | 47.60                               |
| Mb3                                                   | -29.46     | -23.15                              | CRb1    | -0.22      | -0.09                               |
| Mb4                                                   | -27.01     | -21.76                              | CRb2    | -0.18      | -0.08                               |
| TSb1                                                  | 19.36      | 17.77                               | CRb3    | -0.36      | -0.18                               |
| TSb2                                                  | 18.92      | 17.42                               | CRb5    | -0.29      | -0.10                               |
| TSb3                                                  | 6.89       | 7.23                                | CRb8    | -0.13      | -0.13                               |
| TSb4                                                  | 5.55       | 6.51                                |         |            |                                     |
| TSb5                                                  | 0.98       | 1.52                                |         |            |                                     |
